# Supplementary material
Source: PubMed Central journal article supplement (PMC4601662)
Supplement: embj0034-2408-sd1.pdf [file embj0034-2408-sd1.pdf]

## APPENDIX

| <b>APPENDIX FIGURES AND TABLES</b>                                                                         |                                                                                                                                                | <b>Pg.</b>   |
|------------------------------------------------------------------------------------------------------------|------------------------------------------------------------------------------------------------------------------------------------------------|--------------|
| <b>Figure S1.</b>                                                                                          | Characterization of $\alpha$ -syn assemblies used throughout this work                                                                         | <b>2</b>     |
| <b>Figure S2.</b>                                                                                          | Immunodetection of $\alpha$ -syn clusters on cell surface.                                                                                     | <b>3</b>     |
| <b>Figure S3.</b>                                                                                          | Concentration-dependent increase in $\alpha$ -syn clustering                                                                                   | <b>4</b>     |
| <b>Figure S4.</b>                                                                                          | Example of unambiguous mass spectrometric identification of $\alpha$ 3-NKA obtained from neurons exposed for 10 min to fibrillar $\alpha$ -syn | <b>5</b>     |
| <b>Figure S5.</b>                                                                                          | Membrane expression of $\alpha$ 3-NKA and chimeric $\alpha$ 3/ $\alpha$ 1-NKA constructs.                                                      | <b>6</b>     |
| <b>Figure S6.</b>                                                                                          | Protocol for the measurement of Na <sup>+</sup> dynamics in neurons                                                                            | <b>7</b>     |
| <b>Table S1.</b>                                                                                           | (Data used in Figure 1B) Age-dependent clustering of $\alpha$ -syn assemblies                                                                  | <b>8</b>     |
| <b>Table S2.</b>                                                                                           | (Data supporting Figure S3) Concentration-dependent clustering of $\alpha$ -syn assemblies                                                     | <b>9</b>     |
| <b>Table S3.</b>                                                                                           | (Data used in Figure 2A and 2B) Time-dependent clustering of $\alpha$ -syn assemblies                                                          | <b>10</b>    |
| <b>Table S4.</b>                                                                                           | Association of $\alpha$ -syn and homer/gephyrin                                                                                                | <b>11</b>    |
| <b>Table S5.</b>                                                                                           | (Data supporting Figure 3) Neuronal proteins interacting with extracellularly applied oligomeric $\alpha$ -syn assemblies                      | <b>12</b>    |
| <b>Table S6.</b>                                                                                           | (Data supporting Figure 3) Neuronal proteins interacting with extracellularly applied fibrillar $\alpha$ -syn assemblies                       | <b>13-15</b> |
| <b>Table S7.</b>                                                                                           | Astrocyte proteins interacting with extracellularly applied oligomeric (A) and fibrillar (B) $\alpha$ -syn assemblies                          | <b>16-18</b> |
| <b>Table S8.</b>                                                                                           | (Data supporting Fig 4B) Single particle tracking of pHluorin- $\alpha$ 3-NKA in presence of ATTO-550-tagged $\alpha$ -syn                     | <b>19</b>    |
| <b>Table S9.</b>                                                                                           | (Data supporting Fig 4D and 4E) Single particle tracking of pHluorin- $\alpha$ 3-NKA in presence of unlabeled $\alpha$ -syn                    | <b>20</b>    |
| <b>Table S10.</b>                                                                                          | (Data supporting Fig 6B) Enrichment of $\alpha$ 3-NKA over $\alpha$ -syn at synapses                                                           | <b>21</b>    |
| <b>APPENDIX MATERIAL AND METHODS</b>                                                                       |                                                                                                                                                | <b>Pg.</b>   |
| Preparation, labeling, characterization and assembly of $\alpha$ -syn                                      |                                                                                                                                                | <b>22-30</b> |
| Primary neuronal cultures                                                                                  |                                                                                                                                                |              |
| Pull-down of $\alpha$ -syn-S-tag bound protein complexes and sample preparation for mass spectrometry (MS) |                                                                                                                                                |              |
| Mass spectrometric identification and quantification of the pulled-down proteins                           |                                                                                                                                                |              |
| Co-immunoprecipitation of $\alpha$ 3-NKA and $\alpha$ -syn                                                 |                                                                                                                                                |              |
| <i>In vivo</i> injection of $\alpha$ -syn assemblies and tissue preparation                                |                                                                                                                                                |              |
| Immunohistochemistry, immunocytochemistry and image acquisition and quantification                         |                                                                                                                                                |              |
| Plasmids and Transfection                                                                                  |                                                                                                                                                |              |
| Single particle tracking and analysis                                                                      |                                                                                                                                                |              |
| Super-resolution STORM imaging and analysis                                                                |                                                                                                                                                |              |
| Sodium Dye Loading, Imaging and Analysis                                                                   |                                                                                                                                                |              |
| Calcium Imaging and Analysis                                                                               |                                                                                                                                                |              |
| Software and Statistics                                                                                    |                                                                                                                                                |              |
| <b>APPENDIX REFERENCES</b>                                                                                 |                                                                                                                                                | <b>31</b>    |

Appendix Figure S1

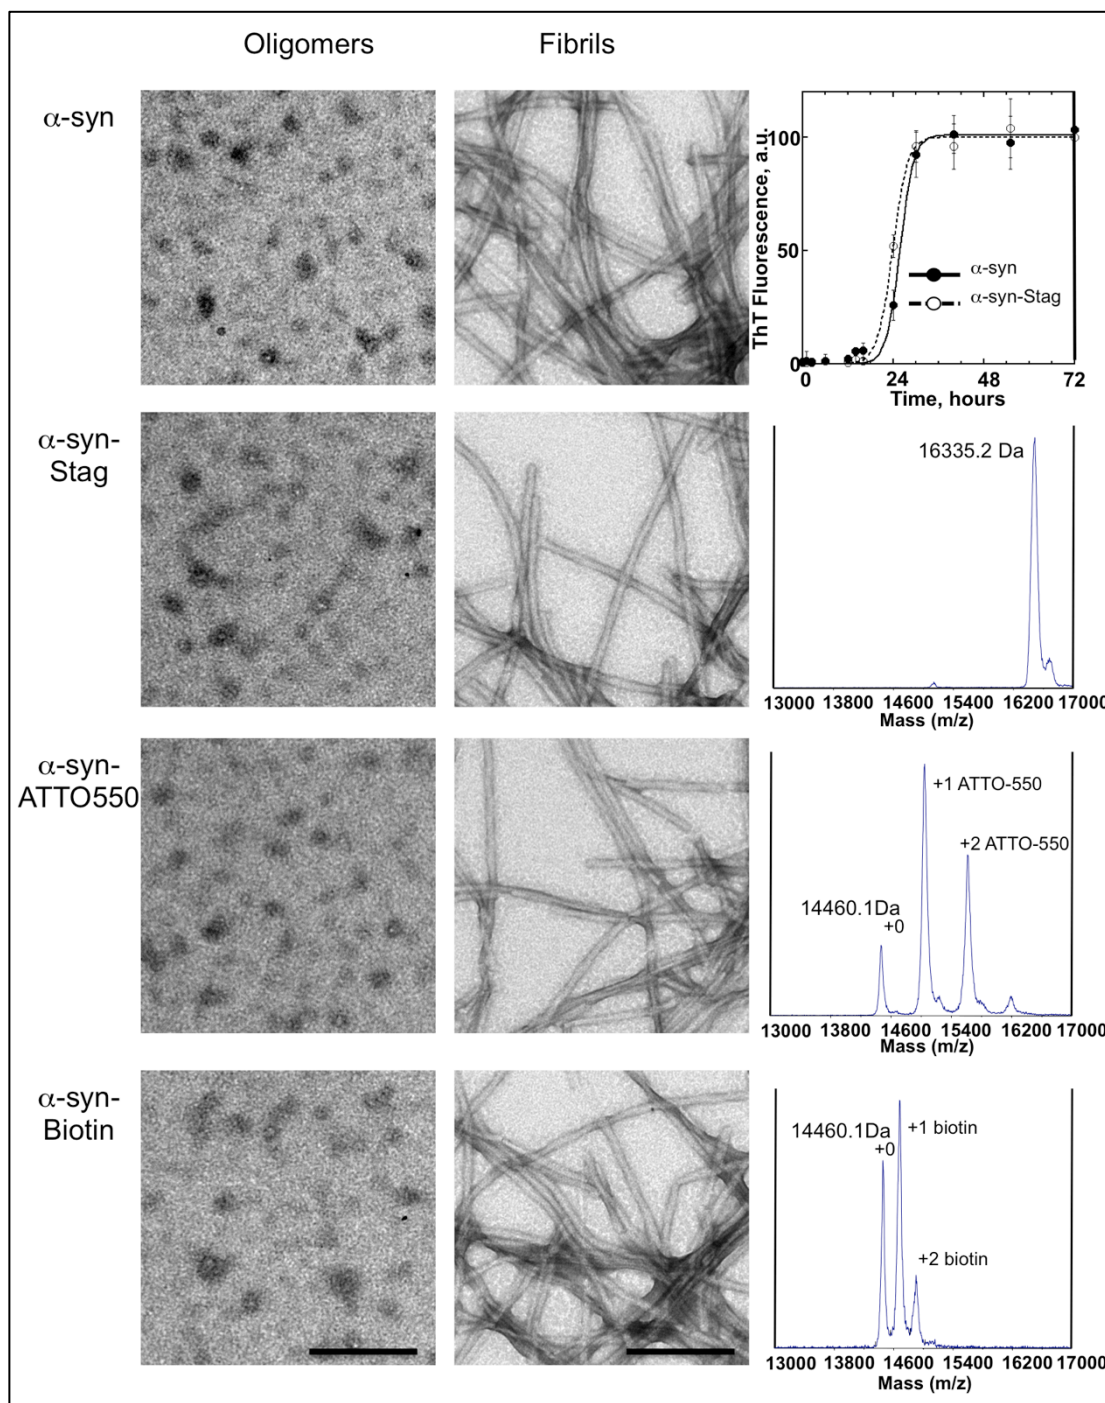

**Appendix Figure S1. Characterization of  $\alpha$ -syn assemblies used throughout this work**

Electron micrographs of oligomeric (left column) and fibrillar (middle column) untagged, S-tagged, ATTO550- and biotin-labeled wild-type  $\alpha$ -syn used throughout this study. The scale bar represents 200 nm. The assembly kinetics assessed by Thioflavin T binding of wild-type untagged (closed circle and solid line) and S-tagged- $\alpha$ -syn (open circles and dashed line), 100  $\mu$ M, in 50 mM Tris pH 7.5, 150 mM KCl, are compared in the top panel of the column on the right. The values are mean  $\pm$  S.E.M. obtained from three independent assembly reactions. No statistically significant difference is observed. The MALDI-TOF mass spectra, from top to bottom of S-tagged, ATTO-550- and biotin-labeled wild-type  $\alpha$ -syn are shown. The spectra show that  $\alpha$ -syn is labeled on average by one ATTO-550 or one biotin molecule.

## Appendix Figure S2

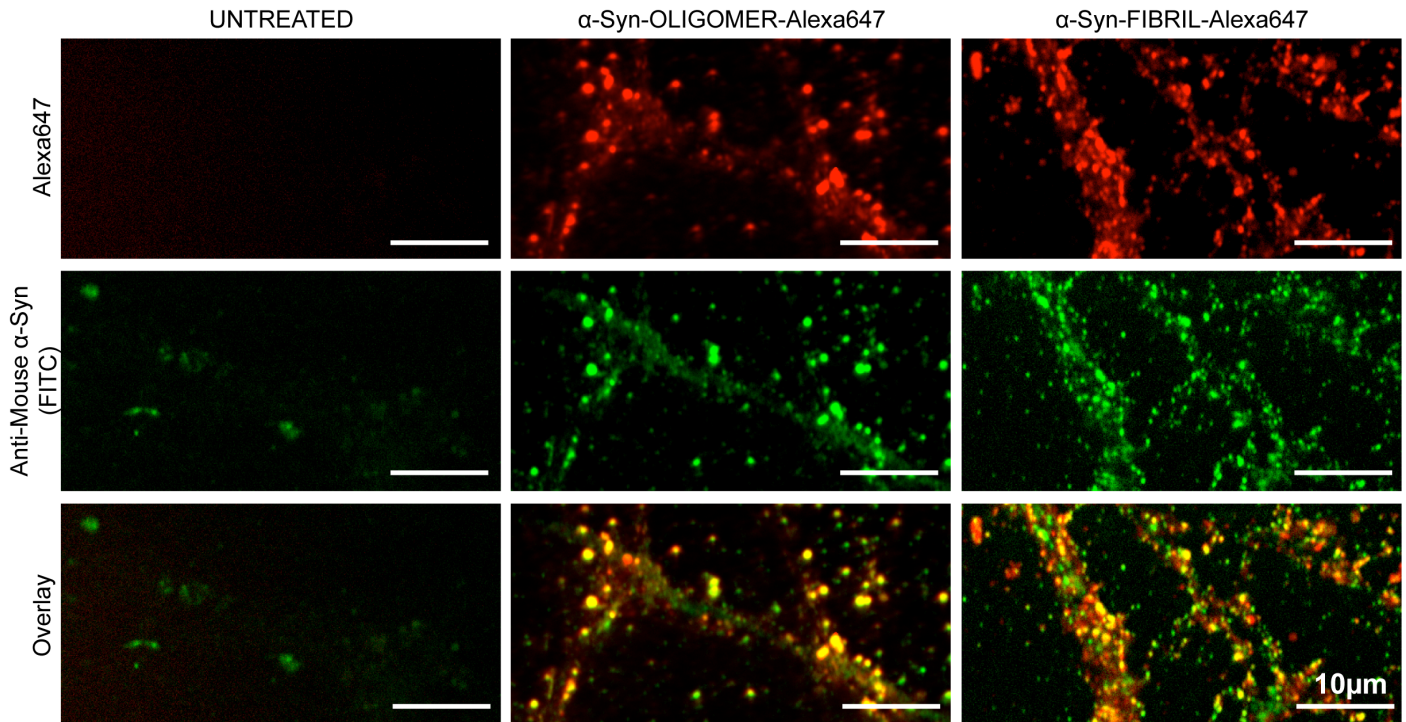

### Appendix Figure S2. Immunodetection of $\alpha$ -syn clusters on cell surface

Cultured striatal neurons unexposed or exposed (60 min) to alexa647-labeled oligomeric (25 nM) or fibrillar (0.03 nM)  $\alpha$ -syn (red) followed by immunolabeling using  $\alpha$ -syn antibody (green) without permeabilization. Almost all alexa647- $\alpha$ -syn clusters were also immunoreactive indicating cell surface localization.

Appendix Figure S3

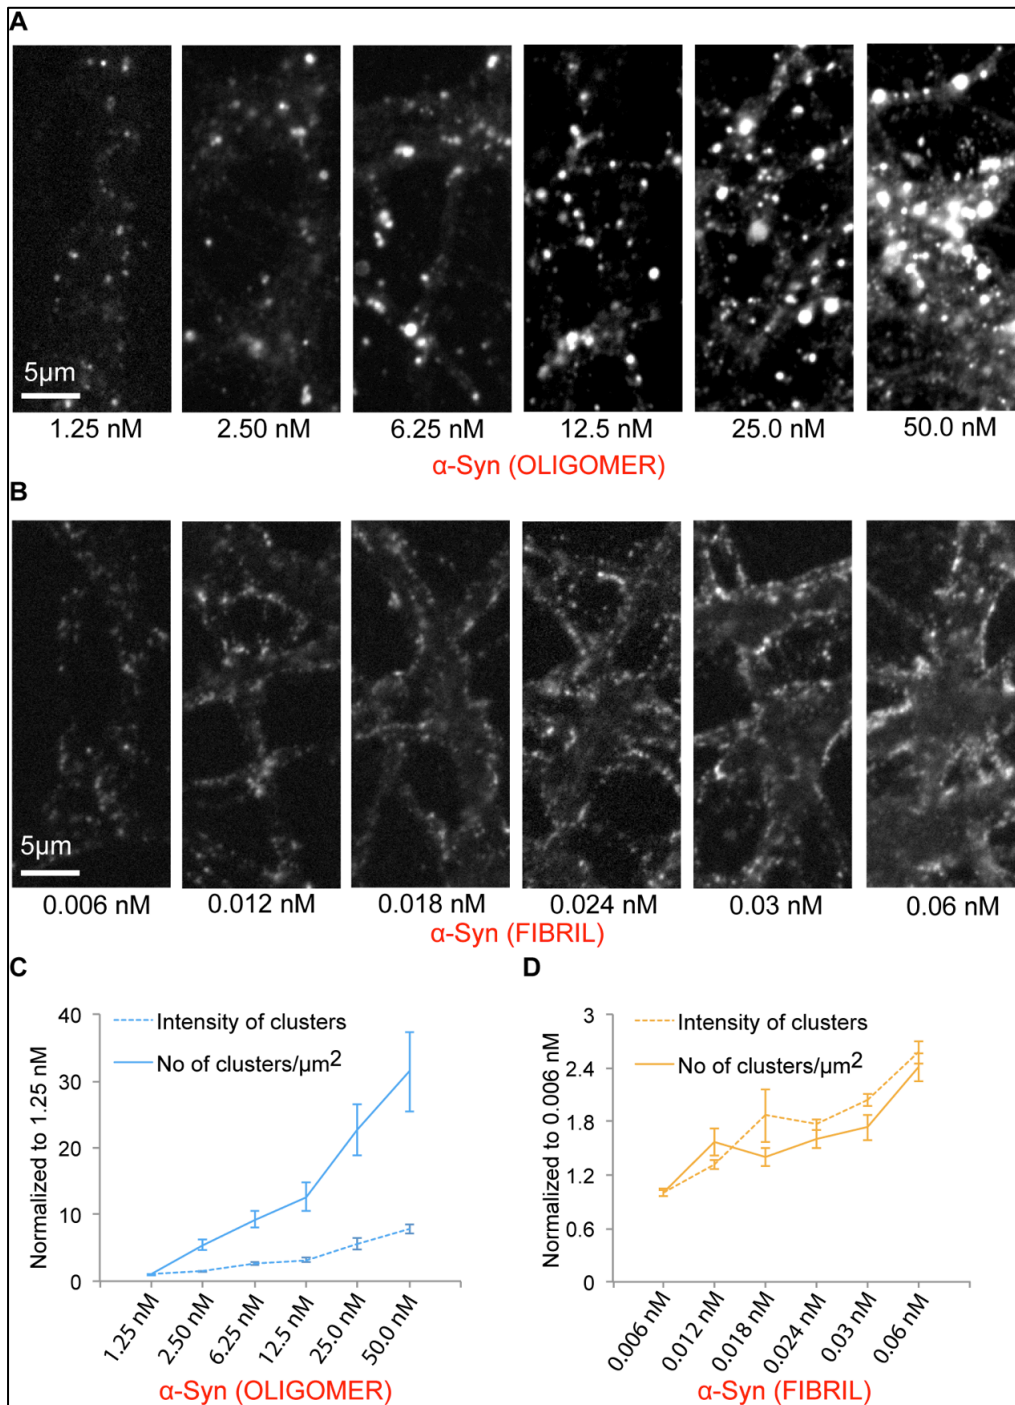

**Appendix Figure S3. Concentration-dependent increase in  $\alpha$ -syn clustering**

(A-D) 21 DIV neurons exposed for 1 h to ATTO-550-labeled oligomeric (A, C, blue) or fibrillar (B, D, orange)  $\alpha$ -syn at indicated concentrations. Note the concentration-dependent increase in the average fluorescence intensity and number per  $\mu\text{m}^2$  of  $\alpha$ -syn clusters. (See Appendix Table S2 for actual values).

## Appendix Figure S4

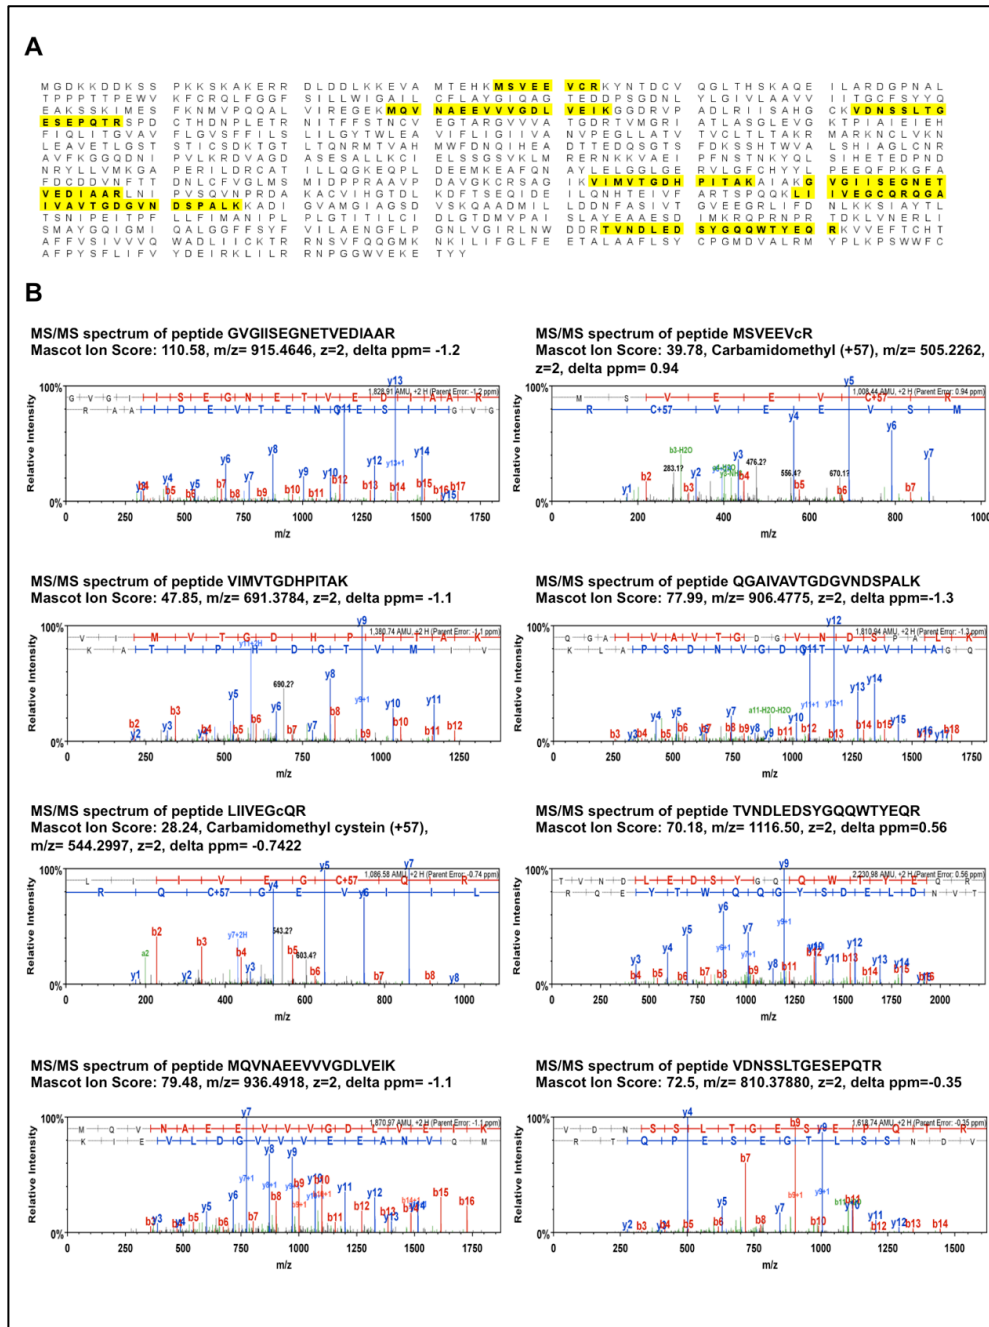

### Appendix Figure S4. Example of unambiguous mass spectrometric identification of $\alpha$ 3-NKA obtained from neurons exposed for 10 min to fibrillar $\alpha$ -syn

(A) Primary structure coverage of  $\alpha$ 3-NKA (Swiss Prot accession number P06687) obtained following on-beads tryptic digestion of the proteins pulled down as described in the material and methods section. The eight amino acid stretches throughout the primary structure, from the N- to the C-terminus, labeled in yellow correspond to peptides identified by nanoLC-MS/MS analysis.  $\alpha$ 3-NKA is identified with confidence. The eight peptides cover 12% (117 out of 1030 amino acid residues) of  $\alpha$ 3-NKA primary structure.

(B) The MS/MS fragmentation spectra of the eight identified peptides are shown as is their primary structure, their mascot ion score and the m/z and the mass accuracy of the fragmented precursor peptide. The primary structure is determined from the y (blue) and b (red) fragment ions.

### Appendix Figure S5

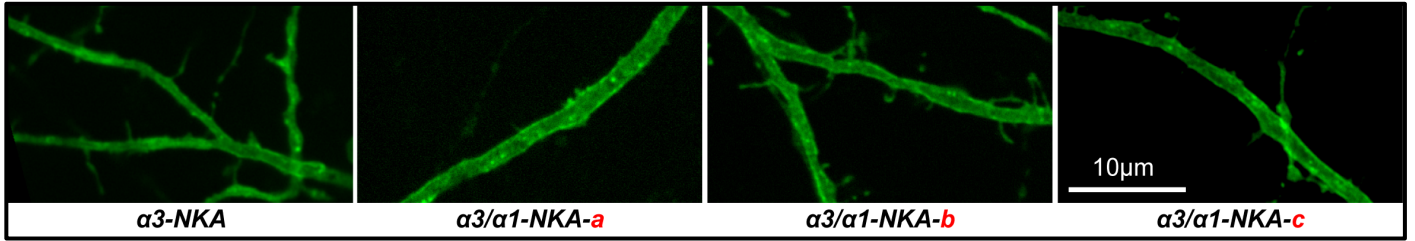

#### Appendix Figure S5. Membrane expression of $\alpha3$ -NKA and chimeric $\alpha3/\alpha1$ -NKA constructs.

Neurons transfected with non-chimeric  $\alpha3$ -NKA-pHluorin or chimeric  $\alpha3/\alpha1$ -NKA-pHluorin (used in **Figure 5A**). Representative images show membrane expression of chimeric constructs similar to that of the  $\alpha3$ -NKA-pHluorin. Scale: 10  $\mu$ m.

## Appendix Figure S6

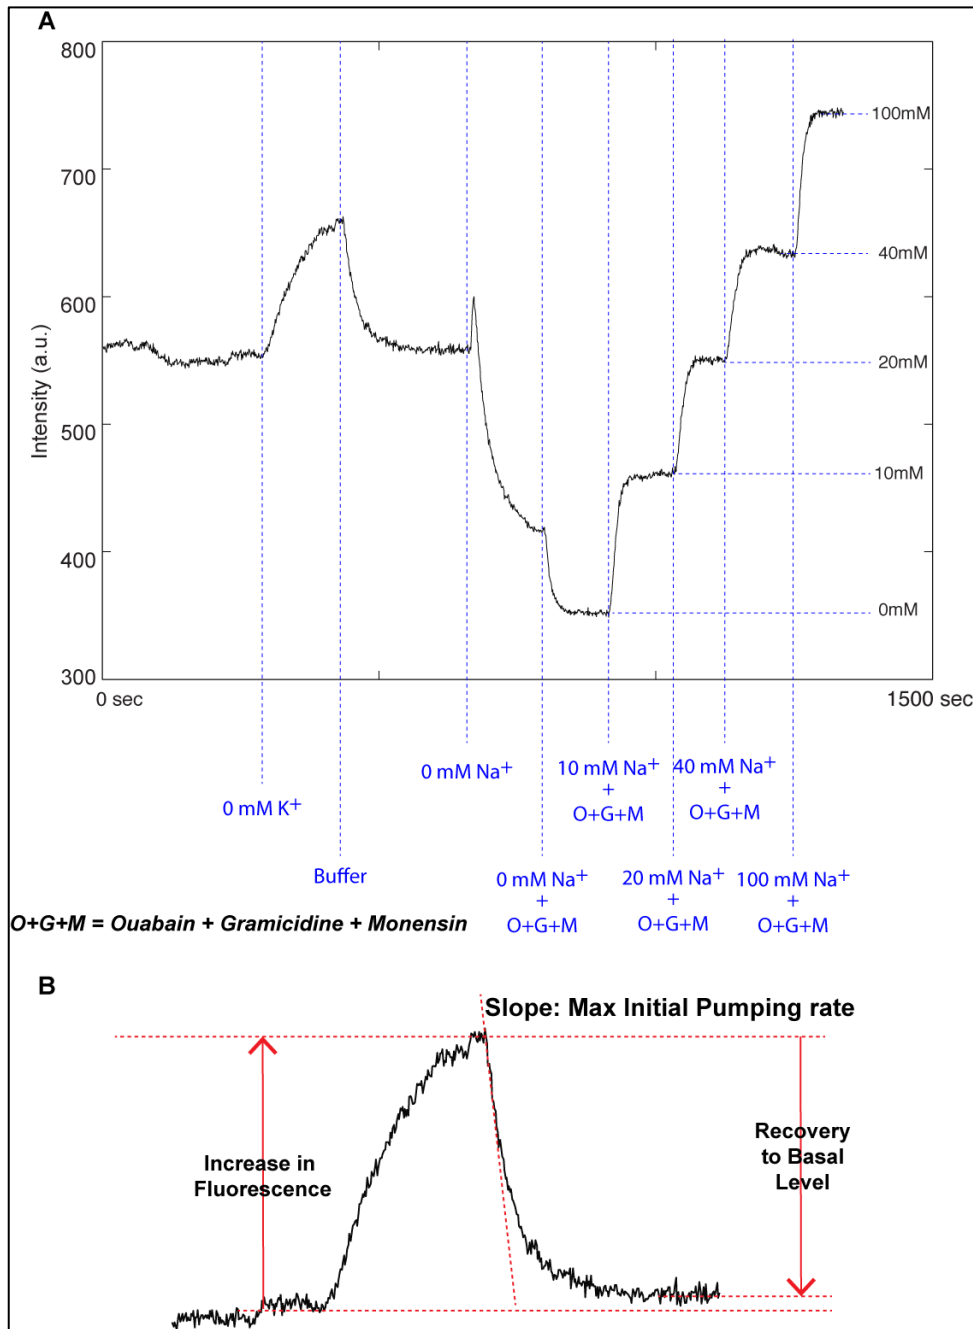

### Appendix Figure S6. Protocol for the measurement of Na<sup>+</sup> dynamics in neurons

(A) A representative trace showing changes in the fluorescence intensity (Y-axis) of Na<sup>+</sup> dye ANG-2 following exchange of solutions as indicated in blue (See Material and Methods for all buffer compositions). First ~10 ml of 0 mM K<sup>+</sup> recording solution is added to increase Na<sup>+</sup> level in neurons. Then 0 mM K<sup>+</sup> recording solution is replaced with normal recording solution to visualize and measure the extrusion/efflux of Na<sup>+</sup> ions. This step is followed by step-wise Na<sup>+</sup> calibration as illustrated.

(B) Figure showing different parameters computed and plotted in **Figure 9B-D** and **Figure EV4**. Increases in fluorescence measure the relative rise in ANG-2 fluorescence following 0 mM K<sup>+</sup> recording solution application. The initial slope of decay curve measures the “Max Initial Pumping Rate”. Recovery to basal level measures the difference between recovered Na<sup>+</sup> level and basal level.

**Appendix Table S1**  
**(Data used in Figure 1B)**  
**Age-Dependent Clustering of  $\alpha$ -Syn Assemblies**

| <b>Oligomeric <math>\alpha</math>-syn</b> |                                                                           |         |
|-------------------------------------------|---------------------------------------------------------------------------|---------|
|                                           | <b>Intensity of Clusters</b><br>(Normalized to DIV 7)<br>(Mean $\pm$ SEM) |         |
| <b>DIV 7</b>                              | 1.00 $\pm$ 0.03 (n=20)                                                    |         |
| <b>DIV 14</b>                             | 1.23 $\pm$ 0.07 (n=24) (**)                                               | } (***) |
| <b>DIV 21</b>                             | 2.35 $\pm$ 0.13 (n=35) (***)                                              |         |
| <b>Fibrillar <math>\alpha</math>-syn</b>  |                                                                           |         |
| <b>DIV 7</b>                              | 1.00 $\pm$ 0.03 (n=41)                                                    |         |
| <b>DIV 14</b>                             | 1.29 $\pm$ 0.03 (n=30) (***)                                              | } (ns)  |
| <b>DIV 21</b>                             | 1.26 $\pm$ 0.04 (n=28) (***)                                              |         |

t-test to compare difference between DIV 7 and DIV 14/21 or DIV 14 and DIV 21

ns = not significant, \* p<0.05; \*\* p<0.01; \*\*\* p<0.001

n = field of view (3-experiments on three independent cultures)



**Appendix Table S2**  
**(Data supporting Figure S3)**  
**Concentration-Dependent Clustering of  $\alpha$ -Syn Assemblies**

| <b>Oligomeric <math>\alpha</math>-syn</b> |                                                                                  |                                                                                                       |
|-------------------------------------------|----------------------------------------------------------------------------------|-------------------------------------------------------------------------------------------------------|
|                                           | <b>Intensity of Clusters</b><br>(Normalized to lowest conc.)<br>(Mean $\pm$ SEM) | <b>No. of Clusters/<math>\mu\text{m}^2</math></b><br>(Normalized to lowest conc.)<br>(Mean $\pm$ SEM) |
| <b>1.25 nM</b>                            | 1.00 $\pm$ 0.08 (n=20)                                                           | 1.00 $\pm$ 0.12 (n=20)                                                                                |
| <b>2.50 nM</b>                            | 1.51 $\pm$ 0.10 (n=20) (ns)                                                      | 5.37 $\pm$ 0.79 (n=20) (ns)                                                                           |
| <b>6.25 nM</b>                            | 2.63 $\pm$ 0.29 (n=20) (ns)                                                      | 9.20 $\pm$ 1.25 (n=20) (ns)                                                                           |
| <b>12.50 nM</b>                           | 3.16 $\pm$ 0.30 (n=20) (**)                                                      | 12.64 $\pm$ 2.12 (n=20) (*)                                                                           |
| <b>25.00 nM</b>                           | 5.56 $\pm$ 0.81(n=20) (***)                                                      | 22.65 $\pm$ 3.84 (n=20) (***)                                                                         |
| <b>50.00 nM</b>                           | 7.83 $\pm$ 0.71 (n=20) (***)                                                     | 31.39 $\pm$ 5.96 (n=20) (***)                                                                         |
| <b>Fibrillar <math>\alpha</math>-syn</b>  |                                                                                  |                                                                                                       |
| <b>0.006 nM</b>                           | 1.00 $\pm$ 0.04 (n=20)                                                           | 1.00 $\pm$ 0.04 (n=20)                                                                                |
| <b>0.012 nM</b>                           | 1.31 $\pm$ 0.05 (n=20) (ns)                                                      | 1.57 $\pm$ 0.16 (n=20) (**)                                                                           |
| <b>0.018 nM</b>                           | 1.87 $\pm$ 0.30 (n=20) (***)                                                     | 1.40 $\pm$ 0.10 (n=20) (ns)                                                                           |
| <b>0.024 nM</b>                           | 1.76 $\pm$ 0.06 (n=20) (***)                                                     | 1.60 $\pm$ 0.10 (n=20) (**)                                                                           |
| <b>0.030 nM</b>                           | 2.04 $\pm$ 0.07 (n=20) (***)                                                     | 1.74 $\pm$ 0.15 (n=20) (***)                                                                          |
| <b>0.060 nM</b>                           | 2.57 $\pm$ 0.13 (n=10) (***)                                                     | 2.41 $\pm$ 0.16 (n=10) (***)                                                                          |

One-way ANOVA with Dunnett's test to compare the difference from lowest concentration used (Oligomer:

1.25 nM; Fibril: 0.006 nM) (2 experiments)

ns = not significant, \*p<0.05; \*\*p<0.01; \*\*\*p<0.001

### Appendix Table S3

(Data used in Figure 2A-B)

#### Time-Dependent Clustering of $\alpha$ -Syn Assemblies

| <b>Oligomeric <math>\alpha</math>-syn</b> |                                                                          |                                                                                              |
|-------------------------------------------|--------------------------------------------------------------------------|----------------------------------------------------------------------------------------------|
|                                           | <b>Intensity of Clusters</b><br>(Normalized to 5min)<br>(Mean $\pm$ SEM) | <b>No of Clusters/<math>\mu\text{m}^2</math></b><br>(Normalized to 5min)<br>(Mean $\pm$ SEM) |
| <b>5 min</b>                              | 1.00 $\pm$ 0.05 (n=35)                                                   | 1.00 $\pm$ 0.06 (n=35)                                                                       |
| <b>60 min</b>                             | 2.04 $\pm$ 0.14 (n=35) (***)                                             | 1.39 $\pm$ 0.06 (n=35) (***)                                                                 |
| <b>Fibrillar <math>\alpha</math>-syn</b>  |                                                                          |                                                                                              |
| <b>5 min</b>                              | 1.00 $\pm$ 0.02 (n=35)                                                   | 1.00 $\pm$ 0.04 (n=35)                                                                       |
| <b>60 min</b>                             | 2.01 $\pm$ 0.15 (n=35) (***)                                             | 1.98 $\pm$ 0.09 (n=35) (***)                                                                 |

t-test to compare difference from 5min

ns = not significant, \*p<0.05; \*\*p<0.01; \*\*\*p<0.001

n = field of view; (3-experiments on three independent cultures)

**Appendix Table S4**  
**Association of  $\alpha$ -Syn and Homer/Gephyrin**

| <b>Oligomeric <math>\alpha</math>-syn</b> |                                                |                                                   |
|-------------------------------------------|------------------------------------------------|---------------------------------------------------|
|                                           | <b>% Association-Homer</b><br>(Mean $\pm$ SEM) | <b>% Association-Gephyrin</b><br>(Mean $\pm$ SEM) |
| <b>1.25 nM</b>                            | 4.8 $\pm$ 1.1 (n=20)                           | 3.7 $\pm$ 0.8 (n=20)                              |
| <b>2.50 nM</b>                            | 12.9 $\pm$ 2.1 (n=20) (ns)                     | 11.4 $\pm$ 1.8 (n=20) (*)                         |
| <b>6.25 nM</b>                            | 19.3 $\pm$ 3.3 (n=20) (***)                    | 17.8 $\pm$ 2.8 (n=20) (***)                       |
| <b>12.50 nM</b>                           | 25.5 $\pm$ 3.2 (n=20) (***)                    | 24.8 $\pm$ 2.7 (n=20) (***)                       |
| <b>25.00 nM</b>                           | 38.2 $\pm$ 2.6 (n=20) (***)                    | 34.3 $\pm$ 1.6 (n=20) (***)                       |
| <b>50.00 nM</b>                           | 45.8 $\pm$ 2.2 (n=20) (***)                    | 45.7 $\pm$ 1.9 (n=20) (***)                       |
| <b>Fibrillar <math>\alpha</math>-syn</b>  |                                                |                                                   |
| <b>0.006 nM</b>                           | 26.6 $\pm$ 1.4 (n=20)                          | 23.4 $\pm$ 1.1 (n=20)                             |
| <b>0.012 nM</b>                           | 36.2 $\pm$ 1.2 (n=20) (***)                    | 33.1 $\pm$ 1.4 (n=20) (***)                       |
| <b>0.018 nM</b>                           | 43.3 $\pm$ 1.9 (n=20) (***)                    | 41.1 $\pm$ 2.3 (n=20) (***)                       |
| <b>0.024 nM</b>                           | 47.5 $\pm$ 1.4 (n=20) (***)                    | 42.3 $\pm$ 1.4 (n=20) (***)                       |
| <b>0.030 nM</b>                           | 47.7 $\pm$ 0.8 (n=20) (***)                    | 43.9 $\pm$ 1.4 (n=20) (***)                       |
| <b>0.060 nM</b>                           | 60.1 $\pm$ 1.4 (n=10) (***)                    | 59.9 $\pm$ 1.5 (n=10) (***)                       |

One-way ANOVA with Dunnett's test to compare the difference from lowest concentration used (Oligomer: 1.25 nM; Fibril: 0.006 nM) (2 experiments)

ns = not significant, \*p<0.05; \*\*p<0.01; \*\*\*p<0.001

## Appendix Table S5

### List of proteins from whole neurons lysates interacting with extracellularly applied oligomeric $\alpha$ -syn

$\infty$ : the spectral count ratio is infinite as the protein is pulled-down only with oligomeric  $\alpha$ -synuclein  
Fold change corresponds to the average spectral count ratio of three independent replicates

**In bold**, the unique plasma membrane protein pulled-down both with oligomeric and fibrillar  $\alpha$ -synuclein and presenting both transmembrane and extracellularly exposed regions.

| Protein Name                                                      | Gene Name     | Accession Number | Fold Change (Syn/Ctrl) |
|-------------------------------------------------------------------|---------------|------------------|------------------------|
| 40S ribosomal protein S28                                         | Rps28         | P62858           | 7.0                    |
| 40S ribosomal protein S5                                          | Rps5          | P24050           | 2.2                    |
| 78 kDa glucose-regulated protein                                  | Hspa5         | P06761           | 5.4                    |
| AP-3 complex subunit delta-1                                      | Ap3d1         | O54774           | 1.8                    |
| ATP synthase subunit beta, mitochondrial                          | Atp5b         | P10719           | 2.0                    |
| Calcium/calmodulin-dependent protein kinase type II subunit gamma | Camk2g        | P11730           | 2.1                    |
| Calmodulin                                                        | Calm1         | P62161           | 2.5                    |
| Creatine kinase B-type                                            | Ckb           | P07335           | 5.0                    |
| Cytoskeleton-associated protein 5                                 | Ckap5         | A2AGT5           | 1.7                    |
| Dihydropyrimidinase-related protein 3                             | Dpysl3        | Q62188           | 2.1                    |
| Double-stranded RNA-binding protein Staufen homolog 2             | Stau2         | Q68SB1           | 1.6                    |
| Elongation factor 2                                               | Eef2          | P05197           | 2.0                    |
| Elongation factor Tu, mitochondrial                               | Tufm          | P85834           | 5.0                    |
| ERC protein 2                                                     | Erc2          | Q8K3M6           | 3.5                    |
| Fragile X mental retardation syndrome-related protein 1           | Fxr1          | Q61584           | 2.0                    |
| Friend of PRMT1 protein                                           | Fop           | Q9CY57           | 2.0                    |
| GMP synthase [glutamine-hydrolyzing]                              | Gmps          | Q3THK7           | 2.0                    |
| Heterogeneous nuclear ribonucleoprotein K                         | Hnrnpk        | P61979           | 1.8                    |
| Kinesin-like protein KIF2A                                        | Kif2a         | P28740           | 1.6                    |
| Myb-binding protein 1A                                            | Mybbp1a       | O35821           | 1.9                    |
| Neuron navigator 1                                                | Nav1          | Q8CH77           | 1.6                    |
| Non-POU domain-containing octamer-binding protein                 | Nono          | Q5FVM4           | 1.7                    |
| Protein unc-13 homolog A                                          | Unc13a        | Q62768           | 3.5                    |
| Protein-L-isoaspartate(D-aspartate) O-methyltransferase           | Pcmt1         | P22062           | 2.5                    |
| Serine/arginine-rich splicing factor 2                            | Srsf2         | Q62093           | 2.4                    |
| Serine/arginine-rich splicing factor 3                            | Srsf3         | P84104           | 1.6                    |
| SLIT-ROBO Rho GTPase-activating protein 2                         | Srgap2        | Q91Z67           | 2.5                    |
| <b>Sodium/potassium-transporting ATPase subunit alpha-3</b>       | <b>Atp1a3</b> | <b>P06687</b>    | <b>1.6</b>             |
| Tubulin beta-4B chain                                             | Tubb4b        | P68372           | 1.6                    |
| Ubiquitin carboxyl-terminal hydrolase isozyme L1                  | Uchl1         | Q00981           | $\infty$               |
| Vesicle-associated membrane protein-associated protein A          | Vapa          | Q9WV55           | 4.0                    |
| WD repeat-containing protein 47                                   | Wdr47         | Q8CGF6           | 2.8                    |

## Appendix Table S6

### List of proteins from whole neurons lysates interacting with extracellularly applied fibrillar $\alpha$ -syn

$\infty$ : the spectral count ratio is infinite as the protein is pulled-down only with fibrillar  $\alpha$ -synuclein

Fold change corresponds to the average spectral count ratio of three independent replicates

**In bold**, the unique plasma membrane pulled-down both with oligomeric and fibrillar  $\alpha$ -synuclein, and presenting both transmembrane and extracellularly exposed regions.

**Column 5: “Proteins identified after cross-linking”** corresponds to proteins identified after cross-linking. All the other proteins were not identified after cross-link.

| Protein name                                          | Gene name | Accession Number | Fold Change (Syn/Ctrl) | Proteins identified after cross-linking |
|-------------------------------------------------------|-----------|------------------|------------------------|-----------------------------------------|
| 14-3-3 protein gamma                                  | Ywhag     | P61982           | $\infty$               | +                                       |
| 14-3-3 protein zeta/delta                             | Ywhaz     | P63102           | $\infty$               | +                                       |
| 40S ribosomal protein S15                             | RPS15     | P62842           | $\infty$               | +                                       |
| 40S ribosomal protein S16                             | Rps16     | P14131           | 3.0                    | +                                       |
| 40S ribosomal protein S17                             | Rps17     | P04644           | 5.0                    | +                                       |
| 40S ribosomal protein S18                             | Rps18     | P62270           | 6.7                    | +                                       |
| 40S ribosomal protein S19                             | Rps19     | P17074           | $\infty$               |                                         |
| 40S ribosomal protein S20                             | Rps20     | P60867           | 1.6                    | +                                       |
| 40S ribosomal protein S25                             | Rps25     | P62852           | 13.0                   |                                         |
| 40S ribosomal protein S29                             | Rps29     | P62274           | 5.5                    | +                                       |
| 40S ribosomal protein S5                              | Rps5      | P24050           | 9.0                    |                                         |
| 40S ribosomal protein S7                              | Rps7      | P62082           | 3.9                    |                                         |
| 5-azacytidine-induced protein 1                       | Azi1      | Q62036           | $\infty$               |                                         |
| 60S ribosomal protein L22-like 1                      | Rpl22l1   | Q9D7S7           | $\infty$               |                                         |
| 60S ribosomal protein L23                             | Rpl23     | P62830           | 3.1                    | +                                       |
| 60S ribosomal protein L27                             | Rpl27     | P61354           | 2.1                    | +                                       |
| 60S ribosomal protein L27a                            | Rpl27a    | P18445           | 2.2                    |                                         |
| 60S ribosomal protein L38                             | Rpl38     | P63174           | $\infty$               |                                         |
| Abl interactor 1                                      | Abi1      | Q8CBW3           | 18.0                   |                                         |
| Acetyl-CoA acetyltransferase, mitochondrial           | Acat1     | P17764           | $\infty$               |                                         |
| Actin filament-associated protein 1                   | Afap1     | Q8VH46           | 4.3                    |                                         |
| Adenomatous polyposis coli protein                    | Apc       | P70478           | $\infty$               |                                         |
| Adenomatous polyposis coli protein 2                  | Apc2      | Q9Z1K7           | $\infty$               |                                         |
| ADP/ATP translocase 2                                 | Slc25a5   | P51881           | 3.7                    |                                         |
| ADP-ribosylation factor GTPase-activating protein 3   | Arfgap3   | Q4KLN7           | $\infty$               |                                         |
| Agrin                                                 | Agrn      | P25304           | $\infty$               |                                         |
| Alpha-internexin                                      | Ina       | P23565           | 34.0                   |                                         |
| Alpha-tubulin N-acetyltransferase                     | Atat1     | Q6MG11           | $\infty$               |                                         |
| Amphiphysin                                           | Amph      | O08838           | $\infty$               |                                         |
| AP-3 complex subunit beta-2                           | Ap3b2     | Q9JME5           | $\infty$               |                                         |
| AP-3 complex subunit delta-1                          | Ap3d1     | O54774           | 4.3                    |                                         |
| Apolipoprotein E                                      | Apoe      | P02650           | $\infty$               |                                         |
| Ataxin-2                                              | Atxn2     | O70305           | $\infty$               |                                         |
| Ataxin-2-like protein                                 | Atxn2l    | Q7TQH0           | $\infty$               |                                         |
| ATP synthase subunit alpha, mitochondrial             | Atp5a1    | P15999           | 1.8                    | +                                       |
| ATP synthase subunit d, mitochondrial                 | Atp5h     | P31399           | $\infty$               |                                         |
| ATP synthase subunit gamma, mitochondrial             | Atp5c1    | P35435           | 25.0                   | +                                       |
| ATP synthase subunit O, mitochondrial                 | Atp5o     | Q06647           | $\infty$               |                                         |
| ATPase family AAA domain-containing protein 3         | Atad3     | Q3KRE0           | $\infty$               |                                         |
| ATP-dependent RNA helicase DDX3X                      | Ddx3x     | Q62167           | 2.4                    | +                                       |
| Bcl-2-associated transcription factor 1               | Bclaf1    | Q8K019           | 10.5                   |                                         |
| Calcium-binding mitochondrial carrier protein Aralar1 | Slc25a12  | Q8BH59           | $\infty$               |                                         |
| Calmodulin-regulated spectrin-associated protein 2    | Camsap2   | Q8C1B1           | $\infty$               |                                         |
| Calmodulin-regulated spectrin-associated protein 3    | Camsap3   | Q80VC9           | $\infty$               |                                         |
| CaM kinase-like vesicle-associated protein            | Camkv     | Q63092           | 6.0                    |                                         |
| CAP-Gly domain-containing linker protein 2            | Clip2     | O55156           | $\infty$               |                                         |
| Caskin-1                                              | Caskin1   | Q8VHK2           | $\infty$               |                                         |
| Catenin delta-2                                       | Ctnnd2    | Q35927           | $\infty$               |                                         |
| Cell division control protein 42 homolog              | Cdc42     | P60766           | $\infty$               |                                         |
| Centrosomal protein of 170 kDa                        | Cep170    | Q6A065           | 37.0                   |                                         |
| Charged multivesicular body protein 2b                | Chmp2b    | Q8BJF9           | $\infty$               |                                         |
| Chromatin target of PRMT1 protein                     | Chtop     | Q9CY57           | 5.3                    |                                         |
| CLIP-associating protein 2                            | Clasp2    | Q99JD4           | 1.7                    |                                         |
| Coatamer subunit alpha                                | Copa      | Q8CIE6           | 3.0                    |                                         |

| Protein name                                                                | Gene name | Accession Number | Fold Change (Syn/Ctrl) | Proteins identified after cross-linking |
|-----------------------------------------------------------------------------|-----------|------------------|------------------------|-----------------------------------------|
| Cofilin-1                                                                   | Cfl1      | P45592           | 3.8                    | +                                       |
| Cytoplasmic dynein 1 heavy chain 1                                          | Dync1h1   | Q9JHU4           | 62.0                   |                                         |
| Dihydropyrimidinase-related protein 1                                       | Crmp1     | Q62950           | 4.5                    | +                                       |
| Dihydropyrimidinase-related protein 2                                       | Dpysl2    | O08553           | 1.6                    | +                                       |
| Disks large-associated protein 1                                            | Dlgap1    | Q9D415           | ∞                      |                                         |
| Disks large-associated protein 4                                            | Dlgap4    | P97839           | ∞                      |                                         |
| DnaJ homolog subfamily A member 1                                           | Dnaja1    | P63036           | ∞                      |                                         |
| DnaJ homolog subfamily B member 1                                           | Dnajb1    | Q9QYJ3           | ∞                      |                                         |
| DnaJ homolog subfamily B member 2                                           | Dnajb2    | Q9QYI5           | ∞                      |                                         |
| DnaJ homolog subfamily B member 5                                           | Dnajb5    | O89114           | ∞                      |                                         |
| DnaJ homolog subfamily B member 6                                           | Dnajb6    | O54946           | ∞                      |                                         |
| Dynactin subunit 1                                                          | Dctn1     | P28023           | 4.0                    |                                         |
| Elongation factor 1-alpha 1                                                 | Eef1a1    | P10126           | 2.6                    | +                                       |
| Elongation factor Tu, mitochondrial                                         | Tufm      | P85834           | 27.5                   |                                         |
| Ena/VASP-like protein                                                       | Evl       | O08719           | ∞                      |                                         |
| Eukaryotic translation initiation factor 3 subunit C                        | Eif3c     | B5DFC8           | ∞                      |                                         |
| Glyceraldehyde-3-phosphate dehydrogenase                                    | Gapdh     | P04797           | 2.6                    | +                                       |
| Glypican-1                                                                  | Gpc1      | P35053           | ∞                      |                                         |
| Glypican-2                                                                  | Gpc2      | P51653           | ∞                      |                                         |
| Glypican-4                                                                  | Gpc4      | P51655           | ∞                      |                                         |
| Guanine nucleotide-binding protein G(I)/G(S)/G(T) subunit beta-1            | Gnb1      | P54311           | ∞                      |                                         |
| Heat shock cognate 71 kDa protein                                           | HSPA8     | P63018           | 5.0                    | +                                       |
| Hepatoma-derived growth factor-related protein 2                            | Hdgrp2    | Q925G1           | ∞                      |                                         |
| Heterochromatin protein 1-binding protein 3                                 | Hp1bp3    | Q6P747           | 6.0                    |                                         |
| Heterogeneous nuclear ribonucleoprotein D0                                  | Hnrnpd    | Q60668           | ∞                      | +                                       |
| Heterogeneous nuclear ribonucleoprotein D-like                              | Hnrpdl    | Q9Z130           | ∞                      |                                         |
| Heterogeneous nuclear ribonucleoprotein K                                   | Hnrnpk    | P61979           | 4.5                    | +                                       |
| Heterogeneous nuclear ribonucleoprotein M                                   | Hnrnpm    | Q62826           | 5.4                    |                                         |
| Heterogeneous nuclear ribonucleoprotein U-like protein 2                    | Hnrnpul2  | Q00PI9           | 2.7                    | +                                       |
| Histone H2A.J                                                               | H2afj     | A9UMV8           | 1.7                    |                                         |
| Histone H2A.Z                                                               | H2afz     | P0C0S6           | 6.0                    |                                         |
| Histone H4                                                                  | Hist1h4b  | P62804           | 1.6                    | +                                       |
| Host cell factor 1                                                          | Hcfc1     | Q61191           | ∞                      |                                         |
| IQ motif and SEC7 domain-containing protein 1                               | Iqsec1    | Q8R0S2           | ∞                      |                                         |
| Kelch-like protein 22                                                       | Klhl22    | D3ZZC3           | ∞                      |                                         |
| KH domain-containing, RNA-binding, signal transduction-associated protein 1 | Khdrbs1   | Q91V33           | ∞                      |                                         |
| Kinesin heavy chain isoform 5C                                              | Kif5c     | P28738           | 26.5                   |                                         |
| Lamin-B1                                                                    | Lmnb1     | P70615           | ∞                      |                                         |
| Lipid phosphate phosphatase-related protein type 4                          | Lppr4     | Q7TME0           | ∞                      |                                         |
| Liprin-alpha-2                                                              | Ppfa2     | Q8BSS9           | 6.0                    |                                         |
| MAP/microtubule affinity-regulating kinase 3                                | Mark3     | Q8VHF0           | 11.0                   |                                         |
| MAP/microtubule affinity-regulating kinase 4                                | Mark4     | Q8CIP4           | ∞                      |                                         |
| MAP7 domain-containing protein 1                                            | Map7d1    | A2AJI0           | ∞                      |                                         |
| Microtubule-associated protein 1B                                           | Map1b     | P14873           | 2.7                    | +                                       |
| Microtubule-associated protein 1S                                           | Map1s     | P0C5W1           | ∞                      |                                         |
| Microtubule-associated protein 2                                            | Map2      | P15146           | 5.9                    | +                                       |
| Microtubule-associated protein 4                                            | Map4      | Q5M7W5           | 3.5                    |                                         |
| Microtubule-associated protein 6                                            | Map6      | Q63560           | 3.0                    | +                                       |
| Microtubule-associated protein tau                                          | Mapt      | P19332           | 5.4                    | +                                       |
| Microtubule-associated serine/threonine-protein kinase 1                    | Mast1     | Q810W7           | ∞                      |                                         |
| Mitochondrial glutamate carrier 1                                           | Slc25a22  | Q9D6M3           | ∞                      |                                         |
| Mitogen-activated protein kinase kinase kinase kinase 4                     | Map4k4    | P97820           | ∞                      |                                         |
| Myc box-dependent-interacting protein 1                                     | Bin1      | O08539           | ∞                      |                                         |
| Myosin regulatory light chain 12B                                           | Myl12b    | P18666           | ∞                      |                                         |
| Nck-associated protein 1                                                    | Nckap1    | P28660           | 4.0                    |                                         |
| Neurexin-1-alpha                                                            | Nrxn1     | Q63372           | ∞                      |                                         |
| Neurexin-2-alpha                                                            | Nrxn2     | Q63374           | ∞                      |                                         |
| Neurofilament light polypeptide                                             | Nefl      | P19527           | ∞                      |                                         |
| Neurofilament medium polypeptide                                            | Nefm      | P12839           | ∞                      |                                         |
| Neuromodulin                                                                | Gap43     | P07936           | 4.0                    | +                                       |
| Neuron navigator 1                                                          | Nav1      | Q8CH77           | 44.3                   |                                         |

| Protein name                                                | Gene name     | Accession Number | Fold Change (Syn/Ctrl) | Proteins identified after cross-linking |
|-------------------------------------------------------------|---------------|------------------|------------------------|-----------------------------------------|
| Neuron navigator 3                                          | Nav3          | Q80TN7           | ∞                      |                                         |
| Neuronal migration protein doublecortin                     | Dcx           | O88809           | 4.2                    |                                         |
| Nucleolar and coiled-body phosphoprotein 1                  | Nolc1         | P41777           | ∞                      |                                         |
| Pinin                                                       | Pnn           | O35691           | ∞                      |                                         |
| Polymerase delta-interacting protein 3                      | Poldip3       | Q8BG81           | ∞                      |                                         |
| Prelamin-A/C                                                | Lmna          | P48679           | ∞                      |                                         |
| Prickle-like protein 2                                      | Prickle2      | Q80Y24           | ∞                      |                                         |
| Prohibitin-2                                                | Phb2          | O35129           | ∞                      |                                         |
| Protein bassoon                                             | Bsn           | O88778           | 11.0                   |                                         |
| Protein FAM54B                                              | Fam54b        | Q5XII9           | ∞                      |                                         |
| Protein Hook homolog 3                                      | Hook3         | Q8BUK6           | ∞                      |                                         |
| Protein KIAA0284                                            | Kiaa0284      | Q80U49           | ∞                      |                                         |
| Protein NipSnap homolog 1                                   | Nipsnap1      | O55125           | ∞                      |                                         |
| Protein piccolo                                             | Pclo          | Q9JKS6           | ∞                      |                                         |
| Protein RUFY3                                               | Rufy3         | Q5FVJ0           | ∞                      |                                         |
| Protein TANC2                                               | Tanc2         | A2A690           | ∞                      |                                         |
| Rabphilin-3A                                                | Rph3a         | P47709           | ∞                      |                                         |
| Ras GTPase-activating protein SynGAP                        | Syngap1       | Q9QUH6           | ∞                      |                                         |
| Ras-related C3 botulinum toxin substrate 1                  | Rac1          | P63001           | ∞                      | +                                       |
| Ras-related protein M-Ras                                   | Mras          | O08989           | ∞                      |                                         |
| Ras-related protein Rab-8A                                  | Rab8a         | P35280           | ∞                      |                                         |
| Ras-related protein Ral-A                                   | Rala          | P63322           | ∞                      |                                         |
| Ras-related protein Rap-1A                                  | Rap1a         | P62835           | ∞                      |                                         |
| Regulating synaptic membrane exocytosis protein 1           | Rims1         | Q9JIR4           | 1.6                    |                                         |
| Rho GTPase-activating protein 33                            | Arhgap33      | Q80YF9           | ∞                      |                                         |
| Ribosome-binding protein 1                                  | Rrbp1         | Q99PL5           | 10.0                   |                                         |
| SAFB-like transcription modulator                           | Sltm          | Q8CH25           | ∞                      |                                         |
| Septin-7                                                    | Sept7         | O55131           | ∞                      |                                         |
| Serine/arginine repetitive matrix protein 2                 | Srrm2         | Q8BTI8           | ∞                      |                                         |
| Serine/arginine-rich splicing factor 7                      | Srsf7         | Q8BL97           | 1.8                    |                                         |
| Serine/threonine-protein kinase DCLK1                       | Dclk1         | Q9JLM8           | 2.9                    |                                         |
| Serine/threonine-protein kinase DCLK2                       | Dclk2         | Q5MPA9           | 65.0                   |                                         |
| Serine/threonine-protein kinase MARK1                       | Mark1         | O08678           | 8.0                    |                                         |
| Serine/threonine-protein kinase MARK2                       | Mark2         | O08679           | 11.0                   |                                         |
| Signal recognition particle 54 kDa protein                  | Srp54         | Q6AYB5           | ∞                      |                                         |
| <b>Sodium/potassium-transporting ATPase subunit alpha-3</b> | <b>Atp1a3</b> | <b>P06687</b>    | <b>6.0</b>             | <b>+</b>                                |
| Sodium/potassium-transporting ATPase subunit beta-1         | Atp1b1        | P07340           | 2.5                    |                                         |
| SRC kinase signaling inhibitor 1                            | Srcin1        | Q9QXY2           | 3.2                    |                                         |
| Stress-70 protein, mitochondrial                            | HSPA9         | O35501           | ∞                      |                                         |
| Synapsin-1                                                  | Syn1          | P09951           | 29.7                   |                                         |
| Synapsin-2                                                  | Syn2          | Q63537           | ∞                      |                                         |
| Synaptosomal-associated protein 47                          | Snap47        | Q6P6S0           | ∞                      |                                         |
| TBC1 domain family member 10B                               | Tbc1d10b      | Q8BHL3           | ∞                      |                                         |
| T-complex protein 1 subunit alpha                           | Tcp1          | P11983           | ∞                      |                                         |
| T-complex protein 1 subunit beta                            | Cct2          | P80314           | ∞                      | +                                       |
| T-complex protein 1 subunit delta                           | Cct4          | P80315           | ∞                      |                                         |
| T-complex protein 1 subunit gamma                           | Cct3          | P80318           | ∞                      |                                         |
| T-complex protein 1 subunit zeta                            | Cct6a         | P80317           | ∞                      |                                         |
| Testican-1                                                  | Spock1        | Q62288           | ∞                      |                                         |
| Thyroid hormone receptor-associated protein 3               | Thrap3        | Q5M7V8           | ∞                      |                                         |
| Tomoregulin-1                                               | Tmeff1        | Q9QYV1           | ∞                      |                                         |
| Traf2 and NCK-interacting protein kinase                    | Tnik          | P83510           | ∞                      |                                         |
| Transformer-2 protein homolog beta                          | Tra2b         | P62996           | ∞                      | +                                       |
| Transforming protein RhoA                                   | Rhoa          | P61589           | ∞                      |                                         |
| Trifunctional enzyme subunit alpha, mitochondrial           | Hadha         | Q64428           | ∞                      |                                         |
| Tropomyosin alpha-3 chain                                   | Tpm3          | Q63610           | ∞                      |                                         |
| Uncharacterized protein KIAA1107                            | Kiaa1107      | Q80TK0           | ∞                      |                                         |
| Vesicle-associated membrane protein-associated protein A    | Vapa          | Q9WV55           | ∞                      |                                         |
| Vimentin                                                    | Vim           | P31000           | 32.5                   |                                         |
| Voltage-dependent anion-selective channel protein 1         | Vdac1         | Q60932           | 5.0                    |                                         |
| WD repeat-containing protein 37                             | Wdr37         | Q8CBE3           | ∞                      |                                         |
| Zinc finger CCCH domain-containing protein 18               | Zc3h18        | Q6TQE1           | ∞                      |                                         |
| ZW10 interactor                                             | Zwint         | Q8VIL3           | ∞                      |                                         |

## Appendix Table S7A

### List of proteins from whole astrocytes lysates interacting with extracellularly applied oligomeric $\alpha$ -syn

$\infty$ : the spectral count ratio is infinite as the protein is pulled-down only with fibrillar  $\alpha$ -synuclein

**Fold change** corresponds to the average spectral count ratio of three independent replicates

| Protein name                                       | Gene name | Accession Number | Fold Change (Syn/Ctrl) |
|----------------------------------------------------|-----------|------------------|------------------------|
| 14-3-3 protein epsilon                             | Ywhae     | P62260           | 2.7                    |
| 40S ribosomal protein S9                           | Rps9      | P29314           | 1.8                    |
| 60S ribosomal protein L13a                         | Rpl13a    | P35427           | 1.7                    |
| 60S ribosomal protein L26                          | Rpl26     | P61255           | 2.7                    |
| 60S ribosomal protein L7a                          | Rpl7a     | P62425           | 2.2                    |
| 78 kDa glucose-regulated protein                   | Hspa5     | P06761           | 4.4                    |
| Alpha-enolase                                      | Eno1      | P04764           | 1.7                    |
| Arginyl-tRNA synthetase, cytoplasmic               | Rars      | P40329           | $\infty$               |
| Aspartyl-tRNA synthetase, cytoplasmic              | Dars      | P15178           | 1.9                    |
| Bifunctional aminoacyl-tRNA synthetase             | Eprs      | Q8CGC7           | 1.6                    |
| Dextrin                                            | Dstn      | Q7M0E3           | 7.0                    |
| Elongation factor 1-delta                          | Eef1d     | Q68FR9           | 2.0                    |
| FH1/FH2 domain-containing protein 1                | Fhod1     | Q6P9Q4           | 3.0                    |
| Low-density lipoprotein receptor-related protein 2 | Lrp2      | P98158           | 6.5                    |
| Lysyl-tRNA synthetase                              | Kars      | Q99MN1           | 2.2                    |
| Major vault protein                                | Mvp       | Q62667           | 7.0                    |
| NHP2-like protein 1                                | Nhp2l1    | P55770           | 3.0                    |
| Polyadenylate-binding protein 1                    | Pabpc1    | Q9EPH8           | 4.5                    |
| Protein kinase C delta-binding protein             | Prkcdbp   | Q9Z1H9           | 2.0                    |
| Protein lin-7 homolog C                            | Lin7c     | Q792I0           | 1.6                    |
| Putative ATP-dependent RNA helicase DHX30          | Dhx30     | Q5BJS0           | 2.3                    |
| Septin-2                                           | Septin2   | Q91Y81           | 1.7                    |
| SPATS2-like protein                                | Spats2l   | Q5U2T3           | 2.2                    |
| Stress-70 protein, mitochondrial                   | Hspa9     | P48721           | 2.5                    |
| Tricarboxylate transport protein, mitochondrial    | Slc25a1   | P32089           | 2.0                    |



**Table S7B**

**List of proteins from whole astrocytes lysates interacting with extracellularly applied fibrillar  $\alpha$ -syn**

$\infty$ : the spectral count ratio is infinite as the protein is pulled-down only with fibrillar  $\alpha$ -synuclein

**Fold change** corresponds to the average spectral count ratio of three independent replicates

| Protein name                                             | Gene name | Accession Number | Fold Change (Syn/Ctrl) |
|----------------------------------------------------------|-----------|------------------|------------------------|
| ADP/ATP translocase 2                                    | Slc25a5   | P51881           | 2.3                    |
| Apolipoprotein E                                         | Apoe      | P02650           | $\infty$               |
| ATP synthase subunit gamma, mitochondrial                | Atp5c1    | P35435           | 15.0                   |
| ATP synthase subunit O, mitochondrial                    | Atp5o     | Q06647           | $\infty$               |
| Cell division control protein 42 homolog                 | Cdc42     | P60766           | $\infty$               |
| Charged multivesicular body protein 2b                   | Chmp2b    | Q8BJF9           | $\infty$               |
| CLIP-associating protein 2                               | Clasp2    | Q99JD4           | 16.0                   |
| Cofilin-1                                                | Cfl1      | P45592           | 2.0                    |
| 78 KDa Glucose-regulated protein                         | Hspa5     | P06761           | 34.0                   |
| DnaJ homolog subfamily A member 1                        | Dnaja1    | P63036           | $\infty$               |
| Glypican-4                                               | Gpc4      | P51655           | $\infty$               |
| Lamin-B1                                                 | Lmnb1     | P70615           | $\infty$               |
| Pinin                                                    | Pnn       | O35691           | $\infty$               |
| Ras-related C3 botulinum toxin substrate 1               | Rac1      | P63001           | $\infty$               |
| Ras-related protein Rab-8A                               | Rab8a     | P35280           | $\infty$               |
| Ras-related protein Ral-A                                | Rala      | P63321           | $\infty$               |
| Ras-related protein Rap-1A                               | Rap1a     | P62835           | $\infty$               |
| Vesicle-associated membrane protein-associated protein A | Vapa      | Q9WV55           | 4.0                    |
| Voltage-dependent anion-selective channel protein 1      | Vdac1     | Q60932           | $\infty$               |
| Long-chain fatty acid transport protein 1                | Slc27a1   | P97849           | 1.6                    |
| 2',3'-cyclic-nucleotide 3'-phosphodiesterase             | Cnp       | P13233           | $\infty$               |
| 40S ribosomal protein S15                                | RPS15     | P62842           | $\infty$               |
| 40S ribosomal protein S16                                | Rps16     | P14131           | 2.2                    |
| 40S ribosomal protein S17                                | Rps17     | P04644           | 8.0                    |
| 40S ribosomal protein S18                                | Rps18     | P62270           | 6.2                    |
| 40S ribosomal protein S25                                | Rps25     | P62852           | 4.5                    |
| 40S ribosomal protein S29                                | Rps29     | P62274           | 3.0                    |
| 40S ribosomal protein S7                                 | Rps7      | P62082           | 2.0                    |
| 60S ribosomal protein L22-like 1                         | Rpl22l1   | Q9D7S7           | $\infty$               |
| 60S ribosomal protein L24                                | Rpl24     | P83732           | 1.8                    |
| 60S ribosomal protein L38                                | Rpl38     | P63174           | $\infty$               |
| Actin, cytoplasmic                                       | Actb      | P60711           | $\infty$               |
| ADP-ribosylation factor GTPase-activating protein 2      | Arfgap2   | Q3MID3           | $\infty$               |
| ADP-ribosylation factor GTPase-activating protein 3      | Arfgap3   | Q4KLN7           | $\infty$               |
| Alpha-actinin-1                                          | Actn1     | Q9Z1P2           | $\infty$               |
| Alpha-crystallin B chain                                 | CRYAB     | P05811           | $\infty$               |
| Annexin A1                                               | Anxa1     | P07150           | 2.0                    |
| AP-2 complex subunit mu                                  | Ap2m1     | P84091           | 2.5                    |
| Histone H3.3                                             | H3f3b     | P84245           | 2.2                    |
| Ataxin-2                                                 | Atxn2     | O70305           | $\infty$               |
| ATP-dependent RNA helicase DDX3X                         | Ddx3x     | Q62167           | 2.9                    |
| Band 4.1-like protein 5                                  | Epb41l5   | Q5FVG2           | $\infty$               |
| Calmodulin                                               | Calm1     | P62161           | 2.5                    |
| Calmodulin-regulated spectrin-associated protein 2       | Camsap2   | Q8C1B1           | $\infty$               |
| Calponin-1                                               | Cnn1      | Q08091           | $\infty$               |
| Cdc42 effector protein 1                                 | Cdc42ep1  | A1A5P0           | $\infty$               |
| Chordin-like protein 1                                   | Chrdl1    | Q76LD0           | 9.0                    |
| Cytoplasmic dynein 1 heavy chain 1                       | Dync1h1   | Q9JHU4           | 1.6                    |
| DnaJ homolog subfamily A member 2                        | Dnaja2    | Q9QYJ0           | $\infty$               |
| DnaJ homolog subfamily B member 1                        | Dnajb1    | Q9QYJ3           | $\infty$               |
| DnaJ homolog subfamily B member 6                        | Dnajb6    | O54946           | $\infty$               |
| Elongation factor 1-alpha 1                              | Eef1a1    | P10126           | 2.0                    |
| Elongation factor Tu, mitochondrial                      | Tufm      | P85834           | 5.0                    |
| Filamin-A                                                | Flna      | Q8BTM8           | 1.8                    |

| Protein name                                                   | Gene name | Accession Number | Fold Change (Syn/Ctrl) |
|----------------------------------------------------------------|-----------|------------------|------------------------|
| Friend of PRMT1 protein                                        | Fop       | Q9CY57           | 5.0                    |
| G kinase-anchoring protein 1                                   | Gkap1     | Q5XIG5           | 3.0                    |
| Glial fibrillary acidic protein                                | Gfap      | P47819           | 3.2                    |
| Glutathione peroxidase 1                                       | Gpx1      | P04041           | 2.0                    |
| Golgi-associated plant pathogenesis-related protein 1          | Glipr2    | Q9CYL5           | 7.0                    |
| Heat shock cognate 71 kDa protein                              | HSPA8     | P63018           | 3.4                    |
| Heterogeneous nuclear ribonucleoprotein A1                     | Hnrnpa1   | P04256           | ∞                      |
| Heterogeneous nuclear ribonucleoprotein D0                     | Hnrnpd    | Q60668           | ∞                      |
| Heterogeneous nuclear ribonucleoprotein G retrogene-like       | Rbmxtl    | P84586           | 1.6                    |
| Heterogeneous nuclear ribonucleoprotein U-like protein 2       | Hnrnpul2  | Q00PI9           | 25.0                   |
| Heterogeneous nuclear ribonucleoproteins A2/B1                 | Hnrnpa2b1 | A7VJC2           | ∞                      |
| Histone H1.2                                                   | Hist1h1c  | P15864           | ∞                      |
| Histone H2A.Z                                                  | H2afz     | P0C0S6           | ∞                      |
| IQ motif and SEC7 domain-containing protein 1                  | lqsec1    | Q8R0S2           | ∞                      |
| KH domain-containing, RNA-binding, signal transduction-        | Khdrbs1   | Q60749           | ∞                      |
| Kinesin-1 heavy chain                                          | Kif5b     | Q2PQA9           | ∞                      |
| MAP7 domain-containing protein 1                               | Map7d1    | A2AJI0           | ∞                      |
| Microtubule-associated protein 2                               | Map2      | P15146           | 5.4                    |
| Microtubule-associated protein 4                               | Map4      | Q5M7W5           | 3.9                    |
| Microtubule-associated protein 6                               | Map6      | Q63560           | ∞                      |
| Mitochondrial import inner membrane translocase subunit        | Timm44    | O35094           | ∞                      |
| Multifunctional protein ADE2                                   | Paics     | P51583           | 3.0                    |
| Myosin regulatory light chain 12B                              | My12b     | P18666           | 3.8                    |
| Myosin-10                                                      | Myh10     | Q61879           | 1.6                    |
| Nestin                                                         | Nes       | P21263           | ∞                      |
| Non-muscle caldesmon                                           | Cald1     | Q62736           | 4.4                    |
| Nuclear pore complex protein Nup214                            | Nup214    | Q80U93           | ∞                      |
| Nuclear pore complex protein Nup98-Nup96                       | Nup98     | P49793           | ∞                      |
| PDZ and LIM domain protein 5                                   | Pdlim5    | Q62920           | 19.0                   |
| PDZ and LIM domain protein 7                                   | Pdlim7    | Q3TJD7           | 6.0                    |
| Pleckstrin homology-like domain family B member 1              | Phldb1    | Q6PDH0           | 34.0                   |
| Plectin                                                        | Plec      | P30427           | 4.8                    |
| Pre-B-cell leukemia transcription factor-interacting protein 1 | Pbxip1    | A2VD12           | 1.8                    |
| Prelamin-A/C                                                   | Lmna      | P48679           | 3.3                    |
| Protein FAM164A                                                | Fam164a   | Q8BJH1           | 3.0                    |
| Protein lin-7 homolog C                                        | Lin7c     | O88952           | 1.7                    |
| Ras-related protein Rab-13                                     | Rab13     | P35286           | ∞                      |
| Ras-related protein Rab-8B                                     | Rab8b     | P61028           | ∞                      |
| Rho-related GTP-binding protein RhoG                           | Rhog      | P84096           | ∞                      |
| Ribosome biogenesis regulatory protein homolog                 | Rrs1      | A1A5P2           | 3.0                    |
| Septin-7                                                       | Sept7     | O55131           | 1.8                    |
| Serine/arginine repetitive matrix protein 2                    | Srrm2     | Q8BTI8           | ∞                      |
| Serine/threonine-protein kinase DCLK1                          | Dclk1     | Q9JLM8           | 32.0                   |
| Serine/threonine-protein phosphatase PGAM5, mitochondrial      | Pgam5     | Q562B5           | 7.0                    |
| Serpin H1 (Heat shock protein 47)                              | Serpinh1  | P19324           | 6.7                    |
| Signal recognition particle 54 kDa protein                     | Srp54     | P14576           | ∞                      |
| Sorbin and SH3 domain-containing protein 2                     | Sorbs2    | O35413           | ∞                      |
| Stress-70 protein, mitochondrial                               | HSPA9     | O35501           | 3.3                    |
| Sulfide:quinone oxidoreductase, mitochondrial                  | Sqrdl     | Q9R112           | 5.5                    |
| Trifunctional enzyme subunit alpha, mitochondrial              | Hadha     | Q64428           | 4.7                    |
| Trifunctional enzyme subunit beta, mitochondrial               | Hadhb     | Q60587           | 3.0                    |
| Vimentin                                                       | Vim       | P31000           | 2.4                    |
| Vinexin                                                        | Sorbs3    | Q9R1Z8           | ∞                      |
| Voltage-dependent anion-selective channel protein 2            | Vdac2     | P81155           | ∞                      |

### Appendix Table S8

(Data supporting Fig 4B)

#### Single Particle Tracking of pHluorin- $\alpha$ 3-NKA in Presence of ATTO-550-tagged $\alpha$ -Syn

| Median Diffusion Coefficient ( $\mu\text{m}^2/\text{s}$ ) |                      |
|-----------------------------------------------------------|----------------------|
| <b>Oligomeric <math>\alpha</math>-syn</b>                 |                      |
| <b>OUT</b>                                                | 0.11345 (n=1871)     |
| <b>IN</b>                                                 | 0.0671 (n=394) (***) |
| <b>Fibrillar <math>\alpha</math>-syn</b>                  |                      |
| <b>OUT</b>                                                | 0.0995 (n=1305)      |
| <b>IN</b>                                                 | 0.0704 (n=364) (***) |

Kolmogorov-Smirnov statistical analysis to test the difference in distribution;  
(\*\*\*p<0.001) n= no of QDs (3-experiments on three independent cultures)

**Appendix Table S9**

**(Data supporting Fig 4D and 4E)**

**Single Particle Tracking of pHluorin- $\alpha$ 3-NKA in Presence of Unlabeled  $\alpha$ -syn**

(In red: Percentage difference from median value of control)

| <b>Oligomeric <math>\alpha</math>-syn<br/>(SYNAPTIC)</b>       |                  |                                                                           |      |                                                          |      |
|----------------------------------------------------------------|------------------|---------------------------------------------------------------------------|------|----------------------------------------------------------|------|
|                                                                | <b>No of QDs</b> | <b>Median Diffusion Coefficient (<math>\mu\text{m}^2/\text{s}</math>)</b> |      | <b>Median Area Explored (<math>\mu\text{m}^2</math>)</b> |      |
| Control                                                        | 268              | 0.0551                                                                    |      | 0.0884                                                   |      |
| Oligomer-5 min                                                 | 308              | 0.0440 (**)                                                               | -20% | 0.0702 (***)                                             | -21% |
| Oligomer-60 min                                                | 306              | 0.0385 (***)                                                              | -30% | 0.0602 (***)                                             | -32% |
| <b>Oligomeric <math>\alpha</math>-syn<br/>(EXTRA-SYNAPTIC)</b> |                  |                                                                           |      |                                                          |      |
| Control                                                        | 1273             | 0.1021                                                                    |      | 0.2148                                                   |      |
| Oligomer-5 min                                                 | 1277             | 0.0968 (ns)                                                               | -5%  | 0.2028 (*)                                               | -6%  |
| Oligomer-60 min                                                | 1360             | 0.0823 (***)                                                              | -19% | 0.1679 (***)                                             | -22% |
| <b>Fibrillar <math>\alpha</math>-syn<br/>(SYNAPTIC)</b>        |                  |                                                                           |      |                                                          |      |
| Control                                                        | 373              | 0.0603                                                                    |      | 0.0917                                                   |      |
| Fibril-5 min                                                   | 528              | 0.0546 (*)                                                                | -9%  | 0.0668 (***)                                             | -27% |
| Fibril-60 min                                                  | 466              | 0.0476 (***)                                                              | -21% | 0.0641 (***)                                             | -30% |
| <b>Fibrillar <math>\alpha</math>-syn<br/>(EXTRA-SYNAPTIC)</b>  |                  |                                                                           |      |                                                          |      |
| Control                                                        | 1234             | 0.0925                                                                    |      | 0.1631                                                   |      |
| Fibril-5 min                                                   | 1484             | 0.0694 (***)                                                              | -25% | 0.1228 (***)                                             | -24% |
| Fibril-60 min                                                  | 1520             | 0.0583 (***)                                                              | -36% | 0.1010 (***)                                             | -38% |

Kolmogorov-Smirnov test to compare difference in distribution relative to “Control”

ns = not significant, \*p<0.05; \*\*p<0.01; \*\*\*p<0.001

4-experiment each for oligomeric and fibrillar  $\alpha$ -syn was performed on independent cultures and on separate days.

**Appendix Table S10**  
**(Data supporting Fig 6B)**  
**Enrichment of  $\alpha$ 3-NKA over  $\alpha$ -Syn at Synapses**

|                        | <b>Fluorescence Intensity of <math>\alpha</math>3-NKA clusters</b><br>Normalized to Control-synaptic<br>(Mean $\pm$ SEM) |                             |
|------------------------|--------------------------------------------------------------------------------------------------------------------------|-----------------------------|
|                        | <b>Synaptic</b>                                                                                                          | <b>Extra-Synaptic</b>       |
| <b>Control</b>         | 1.00 $\pm$ 0.06 (n=60)                                                                                                   | 0.38 $\pm$ 0.02 (n=60)      |
| <b>Oligomer-5 min</b>  | 1.22 $\pm$ 0.06 (n=60) (**)                                                                                              | 0.42 $\pm$ 0.02 (n=60) (ns) |
| <b>Oligomer-60 min</b> | 1.25 $\pm$ 0.09 (n=60) (**)                                                                                              | 0.39 $\pm$ 0.01 (n=60) (ns) |
| <b>Fibril-5 min</b>    | 1.18 $\pm$ 0.05 (n=60) (*)                                                                                               | 0.41 $\pm$ 0.01 (n=60) (ns) |
| <b>Fibril-60 min</b>   | 1.42 $\pm$ 0.07 (n=60) (***)                                                                                             | 0.48 $\pm$ 0.02 (n=60) (ns) |

One-way ANOVA with Dunnett's test to compare the difference from control

ns = not significant, \*p<0.05; \*\*p<0.01; \*\*\*p<0.001

n = field of view; (3-experiments on three independent cultures)

## MATERIAL AND METHODS

### *Preparation, labeling, characterization and assembly of $\alpha$ -syn*

Recombinant wild type (WT) and C-terminally S-tagged ( $\alpha$ -syn-S-tag) human  $\alpha$ -syn were expressed and purified as described previously (Ghee et al, 2005).  $\alpha$ -syn concentration was determined spectrophotometrically using an extinction coefficient of  $5960 \text{ M}^{-1}\text{cm}^{-1}$  at 280 nm. Pure monomeric  $\alpha$ -syn (0.2–0.5 mM) in 50 mM Tris–HCl, pH 7.5, 150 mM KCl (buffer A) was filtered through sterile 0.22  $\mu\text{m}$  filters and stored at  $-80^\circ\text{C}$ . For oligomers and fibrils formation, monomeric  $\alpha$ -syn in buffer A were respectively incubated at  $4^\circ\text{C}$  for 7 days or  $37^\circ\text{C}$  for 4 days under continuous shaking in a thermomixer (Eppendorf, Germany) set at 600 rpm, respectively. Assembly into fibrils was monitored using Thioflavin T binding. Aliquots (10  $\mu\text{l}$ ) were withdrawn at different time intervals from the assembly reaction and mixed with 400  $\mu\text{l}$  of Thioflavin T (10  $\mu\text{M}$ ) in water and Thioflavin T fluorescence (Excitation wavelength: 440 nm and emissions wavelengths: 480 nm) was recorded using a Cary Eclipse Spectrofluorometer (Varian Inc., Palo Alto, USA). Oligomeric  $\alpha$ -syn was separated from monomeric  $\alpha$ -syn by size exclusion chromatography using a Superose<sup>®</sup> 6 HR10/30 column (GE Healthcare) equilibrated in phosphate buffered saline (PBS) buffer. Fibrillar  $\alpha$ -syn was separated from monomeric  $\alpha$ -syn through 2-cycles of sedimentation at 15000g and re-suspension of the pellet (**Appendix Figure S1**).

Oligomeric or fibrillar  $\alpha$ -syn in PBS were labeled by addition of 2 molar excess of the aminoreactive fluorescent dye ATTO-550 (Reference: AD 550-35, ATTO-Tech GmbH) or biotin using EZ-link Sulfo-NHS-Biotin (sulfosuccinimidobiotin, Perbio Science, UK). Labeling was performed following the manufacturer's recommendations. Unreacted dye or biotin were removed by size exclusion chromatography or three cycles of sedimentation and suspension in PBS for oligomeric or fibrillar  $\alpha$ -syn, respectively. The amount of incorporated ATTO 550 and biotin was assessed by mass spectrometry (**Appendix Figure S1**). The samples were de-salted (with 5% acetonitrile, 0.1% Trifluoroacetic acid (TFA)) and eluted from a C18 reversed-phase Zip-Tip (Millipore, Billerica, MA, USA) in 50% acetonitrile, 0.1% TFA. Peptide samples were mixed in a ratio of 1:5 to 1:20 (v/v) with sinapinic acid (10 mg/mL) in 50% acetonitrile and 0.1% TFA and spotted (0.5  $\mu\text{L}$ ) on a stainless steel MALDI target (Opti-TOF; Applied BioSystems). MALDI-TOF-TOF MS spectra were acquired with a MALDI-TOF/TOF 5800 mass spectrometer (Applied Biosystems) using linear mode acquisition. External calibration was performed using unmodified WT  $\alpha$ -syn. Acquisition and data analysis were performed using the Data Explorer software from Applied Biosystems.

The nature of all  $\alpha$ -syn assemblies used was routinely assessed using a Jeol 1400 (Jeol Ltd., Peabody, MA) Transmission Electron Microscope (TEM) after adsorption of the samples onto carbon-coated 200-mesh grids and negative staining with 1% uranyl acetate. The images were acquired with a Gatan Orius CCD camera (Gatan). The particle concentration of oligomeric and fibrillar  $\alpha$ -syn samples was assessed by analytical ultracentrifugation (AUC) and quantitative transmission electron microscopy (TEM) as previously

described (Pieri et al, 2012). The particle concentration of  $\alpha$ -syn (tagged and untagged) was obtained by dividing  $\alpha$ -syn monomeric concentration by the average number of molecules (as measured by AUC and TEM). For our preparation, the average number of molecules measured for oligomeric and fibrillar  $\alpha$ -syn was 40 and 8333, respectively. The concentration of oligomeric  $\alpha$ -syn was 25 nM and that of fibrillar  $\alpha$ -syn was 0.03 nM, unless specified, corresponding to 1  $\mu$ M or 0.25  $\mu$ M monomeric  $\alpha$ -syn, respectively.

A $\beta$ -oligomers preparation, purification and characterization has been recently described in Shrivastava et al, 2013a.

### *Primary neuronal cultures*

All cultures were prepared from 18-day-old Sprague-Dawley rat embryos (Janvier Labs, France). Pull down and proteomics studies were performed on pure cultures of rat cortical neurons plated on 10 cm plates pre-coated with 80 mg/ml poly-D, L-ornithine. Cortical neurons were used, as they can be prepared in larger quantities (4 X 10<sup>6</sup> cells/dish) as required for these experiments. Pure neuronal cultures were maintained in astrocyte-conditioned neuronal medium supplemented with cytosine-arabioside (5  $\mu$ M) as has been recently described (Shrivastava et al, 2013a). All other experiments were performed on rat striatal neuronal cultures plated on 18 mm coverslips pre-coated with 80 mg/ml poly-D, L-ornithine (Renner et al, 2010). Freshly dissociated (trypsin) striatal cells were plated (10<sup>5</sup> cells/well) in neuronal attachment media consisting of 10% horse serum, 1 mM sodium pyruvate, and 2 mM glutamine in MEM for 3 h. The attachment medium was replaced and cells were maintained in serum-free neurobasal medium supplemented with B27 (1X) and glutamine (2 mM). After 2 days, culture medium was supplemented with cytosine-arabioside to restrict the growth of astrocytes. Cells were maintained by supplementing with fresh medium every week.

### *Pull-down of $\alpha$ -syn-S-tag bound protein complexes and sample preparation for mass spectrometry (MS)*

Oligomeric or fibrillar  $\alpha$ -syn-S-tag (40  $\mu$ M monomer concentration) were added to the culture medium of 2 weeks old pure cortical neuron cultures of rat (3-4 culture dishes per condition). Unexposed neurons were used as control. After 10 minutes, cells were washed twice with 1X PBS and scraped on ice in 50 mM HEPES-KOH (pH 7.5), 2 mM EDTA, 0.1% Triton X-100, supplemented with complete protease inhibitor cocktail (Roche). The extracts were flash frozen in liquid nitrogen and stored at -80°C. Cell lysis was completed by sonication and the protein concentration in the extracts determined using BCA assay kit (Thermo Scientific). To pull down oligomeric or fibrillar  $\alpha$ -syn-S-tag together with their specific protein partners, 0.5 mg of total protein extracts were incubated with S-protein agarose (200  $\mu$ l settled resin) (Novagen) equilibrated in 500  $\mu$ l binding buffer (20 mM Tris-HCl pH 7.5, 150 mM NaCl, 0.1% Triton X-100, Complete protease inhibitors) for 1 h at 4 °C under gentle agitation. Extracts from control-unexposed neurons were also incubated with S-protein agarose beads and used as control. After 3 washes with 5 ml

binding buffer and 3 washes with 5 ml Triton-free binding buffer, the resin was re-suspended in 400  $\mu$ l of 50 mM ammonium bicarbonate pH 8 in the presence of 0.1% RapiGest (Waters corporation, Milford, MA) and heated at 95°C for 10 min. Proteins were then reduced in the presence of 10 mM dithiothreitol (DTT) at 56°C for 30 min and alkylated in 20 mM iodoacetamide (Sigma) at room temperature in the dark for 45 min. Proteins bound to the S-protein agarose beads were digested on the resin by incubating the samples overnight at 37 °C in the presence of 0.8  $\mu$ g trypsin Promega Gold (Promega, Madison, WI). After digestion, the samples were centrifuged for 10 min at 16000g to discard the resins. Trypsin digestion and RapiGest treatment in the supernatants were stopped by addition of 0.5% TFA and incubation at 37°C for 45 min. The tryptic peptide samples were spun for 10 min at 16000g and the supernatants were stored at -80°C for MS analysis.

In the experiments where the cross-linker DTSSP was used to cross-link fibrillar  $\alpha$ -syn-S-tag to its partner membrane proteins, 2 weeks old cortical neurons were treated for 30 minutes with chondroitinase (0.02u/ml) prior to the addition of fibrillar  $\alpha$ -syn-S-tag to favor the interactions. Chemical cross-linking with DTSSP (1 mM in PBS, Pierce, Waltham, MA)) was carried out for 30 min at room temperature prior to cell scraping and pull-down of  $\alpha$ -syn-S-tag cross-linked proteins. For MS identification of  $\alpha$ -syn cross-linked proteins further treatment and protein digestion was performed as described above. For the  $\alpha$ 3-NKA peptide targeted identification strategy, the nanoLC-MS/MS data were processed automatically using the Thermo Proteome Discoverer software (version 1.4) and the SEQUEST search engine with  $\alpha$ 3-NKA primary structure and the following chemical modifications: cysteine carbamidomethylation as fixed modification and methionine oxidation, N-terminal acetylation, and monolink modification of K, S, Y and T residues with DTSSP as variable modifications.

#### *Mass spectrometric identification and quantification of the pulled-down proteins*

For each pull down, 15  $\mu$ l of tryptic peptide digests were analyzed by nanoLC-MS/MS using an EASY-nLC II high performance liquid chromatography (HPLC) system (Proxeon, Thermo- Scientific, Waltham, MA) coupled to the nanoelectrospray ion source of a Linear Ion Trap-OrbitrapVelos mass spectrometer (Thermo Scientific). Peptide separation was performed on a reversed phase C18 nano HPLC column (100  $\mu$ m inner diameter, 5  $\mu$ m C18 particles, 15 cm length, NTCC-360/100-5) from Nikkyo Technos (Nikkyo Technos Co., Ltd., Tokyo, Japan). The peptides were loaded at a pressure-dependent flow rate corresponding to a maximum pressure of 200 bars and eluted at a flow rate of 300 nl/min using a two slope gradient of first 5 to 20% solvent B for 60 min, followed by 20 to 40% solvent B in 40 min and a washing step at 100% solvent B. Solvent A was 0.1% formic acid in water, and solvent B was 0.1% formic acid in 100% acetonitrile. NanoLC-MS/MS experiments were conducted in the data-dependent acquisition mode. The mass of the precursors was measured with a high resolution (60,000 full weight at half maximum) in the Orbitrap. The 20 most intense ions, above an intensity threshold of 5000 counts, were selected for CID fragmentation and



analysis in the LTQ. NanoLC-MS/MS data were processed automatically using the Scaffold software (version 3.6.4) and the SwissProt\_18112011 database with both the Mascot (Perkins et al., 1999) (Version: 2.3.02) and the X! Tandem (Craig & Beavis, 2004) (Version CYCLONE 2010.12.01.1) search engine, a specific trypsin digestion with up to 2 missed cleavages, a tolerance of 0.5 Da for fragment monoisotopic masses and 6 ppm for parent monoisotopic mass tolerance, and the following chemical modifications: Carbamidomethylation of Cys as fixed modification, and dehydration, ammonia loss, oxidation of methionine and N-acetylation as variable modifications. For the Scaffold analysis, thresholds were set at 90% minimum for peptides and 99% and 2 unique peptides minimum for protein.

Identified proteins were quantified by a label-free proteomic approach using spectral counting (Liu et al, 2004) with the Scaffold software. Comparison between controls and samples identified some proteins as 60S ribosomal proteins, nucleolin and ribonuclease inhibitor as major contaminants. Among them nucleolin presented the best reproducibility among experiments and was chosen to normalize the spectral counting data. Only proteins identified with at least 2 unique peptides in at least 2 replicates were quantified. Only proteins with a spectral count ratio, between the cells exposed to  $\alpha$ -syn (either oligomeric or fibrillar) and the control cells, above 1.6 and a p-value <0.05 were considered as significantly increased in the pull-down and thus considered as  $\alpha$ -syn interacting proteins. Spectral count ratios presented in **Appendix Table S5-6** were calculated from averaged spectral counts of three independent replicates. Finally the membrane protein annotation was obtained using the NCBI annotation tool of the Scaffold software. For proteins annotated as membrane proteins, including peripheral extracellular or intracellular membrane proteins and integral membrane proteins, validation of the membrane localization was performed with data reported in the literature (see validated membrane protein list in **Appendix Table S5-6**).

#### *Co-immunoprecipitation of $\alpha$ 3-NKA and $\alpha$ -syn*

Total protein extracts (1.5 mg in in RIPA buffer, 50 mM Tris-HCl pH 7.5, 50 mM NaCl, 2 mM EDTA, 0.5 mM sodium deoxycholate, 0.5% NP-40%, Complete protease inhibitors) were pre-incubated with protein A sepharose (GE Healthcare) for 1h at 4°C. The supernatant was incubated with Goat polyclonal anti Na<sup>+</sup>/K<sup>+</sup>-ATPase alpha3 (C-16, Santa Cruz Catalogue # sc-16052) (5  $\mu$ g) overnight at 4 °C under gentle agitation. Samples were then incubated with protein A-sepharose beads (100  $\mu$ l settled resin) (GE-Healthcare) for 1 h at 4 °C under gentle agitation. As a negative control, protein extracts were incubated with protein A-sepharose beads in the presence of pre-immune goat IgGs. After incubation, the beads were washed with RIPA buffer. The protein A-bound protein complex were denatured with SDS-PAGE buffer for 5 min at 95 °C, resolved on 10% polyacrylamide gels and probed with anti  $\alpha$ -syn (1:2000, BD Biosciences Cat # 610787) antibody. Blots were stripped (2h, heating at 50°C in 62.5 mM Tris HCl pH 6.8, 2% SDS, 100 mM beta-mercaptoethanol) and re-probed with an anti  $\alpha$ -tubulin (1:4000, Abcam mouse monoclonal, DM1A, Cat # ab7291) antibody.

### *In vivo injection of $\alpha$ -syn assemblies and tissue preparation*

Sprague-Dawley rats were obtained from Janvier Labs, France and maintained at the animal house facility (École Normale Supérieure) until surgery. Oligomeric or fibrillar  $\alpha$ -syn injection was performed in 10-week old rats (1 male and 1 female for each  $\alpha$ -syn subtype). Following anesthesia (106 mg/kg ketamine and 7.5 mg/kg xylazine), animals were placed on a stereotaxis apparatus. A tiny hole in the skull was opened and 5  $\mu$ l of  $\alpha$ -syn (oligomer: 100  $\mu$ M, fibril: 20  $\mu$ M monomer concentration) were pressure-injected at a depth of 4.5 mm in the striatum at a flow rate of 0.5  $\mu$ l/min (from the bregma: anteroposterior (AP) 0mm, mediolateral (ML) +3 mm, dorsoventral (DV) +4.5 mm). 8 hr (oligomeric) or 24 hr (fibrillar) following injection, animals were anesthetized using 80 mg/kg pentobarbital intra peritoneal and trans-cardially perfused with 4% paraformaldehyde. Their brains were collected and cryo-protected using sucrose before sectioning. 30  $\mu$ m thick coronal sections were prepared using cryostat maintained at -20°C. Brain sections were stored in 1X PBS-sodium azide solution and immunohistochemistry performed within 10 days.

### *Immunohistochemistry, immunocytochemistry and image acquisition and quantification*

Brain sections were extensively washed in 1X PBS to remove azide followed by blocking in 0.1% gelatin and 0.2% Triton-X-100 in 1X PBS for 45 min. Sections were then incubated overnight with the appropriate primary antibodies diluted in PBS: Rabbit-Homer (1:1000, Synaptic System), Mouse Gephyrin (1:1000, Synaptic System), Mouse MAP2 (1:1500, Millipore), Mouse- $\alpha$ 3-NKA (XVIF9-G10) (1:1000, Thermo Scientific), Rabbit-Synapsin (1:1500, Synaptic System). Following 3 washes (20 min each), slices were incubated with appropriate secondary antibodies (FITC or cy5 conjugated; 1:500, 3 hr). After washing for 2 hr, sections were mounted onto glass slides using Vectashield (Vector Labs). Nuclear stain (DAPI) was added in the mounting medium (1:400). Images were acquired using a Leica confocal TCS SP5 microscope and processed using ImageJ and Metamorph (Molecular Devices) software. For each animal, staining was performed in randomly chosen 5-6 sections within  $\pm$ 250  $\mu$ m from the site of injection. In addition images were acquired from nearly 8-10 randomly chosen regions within the striatum.

Immunocytochemistry was performed as per standard protocol and used previously (Shrivastava et al, 2013a). Permeabilization was performed before antibody incubation as antibody against  $\alpha$ 3-NKA has intracellular epitope. Even after permeabilization,  $\alpha$ 3-NKA immunoreactivity was pre-dominantly found on the plasma membrane as observed previously (Azarias et al, 2013). Following primary antibody incubation for 1 hr: Rabbit-Homer (1:400, Synaptic System), Mouse-Gephyrin (1:400, Synaptic System), Mouse- $\alpha$ 3-NKA (1:3000, Thermo Scientific), Rabbit-Synapsin (1:800, Synaptic System), Rabbit Tau (1:400, Synaptic System), Mouse MAP2 (1:400, Millipore). For  $\alpha$ -syn staining, no permeabilization was performed and mouse monoclonal antibody was used (Clone 42/ $\alpha$ -syn; BD Bioscience). Images were acquired using Leica Inverted Spinning Disk microscope (DM5000B, Coolsnap HQ2 camera, Cobolt lasers).

Confocal and spinning disk images were filtered by wavelet decomposition using an interface implemented in Metamorph (Racine et al, 2007). Wavelet decomposition allows the separation of small and large structures (clusters) based on their fluorescence intensities. This approach was used to generate background free masks showing sites that are enriched (cluster) with a specific protein of interest (homer/gephyrin/synapsin/ $\alpha$ 3-NKA) and has been used in previous publications (Bannai et al, 2009; Renner et al, 2010; Shrivastava et al, 2013a). “Intensity of cluster” means total fluorescence intensity per cluster. Co-localization and/or apposition between the clusters of two images were determined using the masks using Matlab where the total fluorescence intensity of clusters was quantified on the original images after identifying the clusters that were totally or partially co-localizing on the masks (Renner et al, 2010; Shrivastava et al, 2013a). No of fields” in the figure legend refer to the number of microscopic field (1392 x 1042 pixel) that were quantified. Intensity Correlation Quotient (ICQ) was computed on entire field of view using plugin in ImageJ as per the instructions (Li et al, 2004).

#### *Plasmids and Transfection*

TMR-Dendra construct was prepared by replacing GFP with Dendra fluorescent protein (Ribault et al, 2011). Extracellular pHluorin-tagged  $\alpha$ 3-NKA and extracellular EGFP-tagged  $\beta$ 1-NKA plasmids were generated and characterized by Thomas Liebmann. pHluorin was inserted in the 2<sup>nd</sup> extracellular loop between Trp<sup>307</sup> and Leu<sup>308</sup> (Rat sequence: NP\_036638). Chimeric  $\alpha$ 3/ $\alpha$ 1-NKA-a, b and c were generated using site-directed mutagenesis kit (Agilent). Transfection was performed using lipofectamine-2000 (Invitrogen). Transfection medium (TM) was composed of 1 mM sodium pyruvate and 2 mM glutamine in neurobasal medium (Invitrogen). 0.5  $\mu$ g of plasmid and 2  $\mu$ l of lipofectamine-2000 reagent were added separately in 50  $\mu$ l of TM. After 10 min, the two solutions were mixed and left for another 15 min at room temperature. During this period, culture medium from cells was replaced with pre-warmed TM. The culture medium was stored at 37°C. 100  $\mu$ l of Lipofectamine-plasmid mix was then added on top of cells. After 30 min, cells were washed with TM and replaced with original culture medium.

#### *Single particle tracking and analysis*

Quantum dot (QD) based single particle tracking (SPT) protocol and analysis methods have been used and described in several previous publications (Renner et al, 2010, Shrivastava et al, 2013a). For all experiments,  $\alpha$ -syn exposure was performed on live neurons in the culture medium and in an incubator maintained at 37°C/5%CO<sub>2</sub>. Unbound  $\alpha$ -syn was washed before experiments. All the washing and imaging was performed in MEM recording medium (Phenol red-free MEM, 33 mM glucose, 20 mM HEPES, 2 mM glutamine, 1 mM sodium pyruvate, and 1X B27). For SPT of  $\alpha$ -syn, biotin labeled  $\alpha$ -syn assemblies were used. Following exposure to  $\alpha$ -syn assemblies, cells were incubated with streptavidin-QD-605nm (1:5000, 2 min). For SPT of  $\alpha$ 3-NKA, cells were transfected with pHluorin-tagged  $\alpha$ 3-NKA plasmid. Neurons were

labeled using GFP-antibody pre-coupled with QD-605 nm (pre-coupling protocol: 1  $\mu$ l rabbit-GFP antibody + 1  $\mu$ l F<sub>ab</sub>'-QD-605 + 7  $\mu$ l 1X PBS, mix and gently shake for 30 min, add 1  $\mu$ l 1X casein and shake for additional 15 min) (Renner et al, 2009). Synapses were labeled and identified using FM4-64 labeling. All SPT-experiments were performed on neurons aged DIV 16-17. Transfection was performed on DIV 14. Tracking and analysis was performed using SPTrack\_v4, homemade software in Matlab (MathWorks) (Renner et al, 2010). The center of the QD fluorescence spot was determined by Gaussian fit with a spatial resolution of 10–20 nm. The spots in a given frame were associated with the maximum likely trajectories estimated on previous frames of the image sequence. Trajectories with a minimum length of 15 consecutive frames were used. The mean square displacement (MSD) was calculated using  $MSD(ndt) = (N - n)^{-1} \sum_{i=1}^{N-n} [(x_{i+n} - x_i)^2 + (y_{i+n} - y_i)^2]$ , where  $x_i$  and  $y_i$  are the coordinates of an object on frame  $I$ ,  $N$  is the total number of steps in the trajectory,  $dt$  is the time between two successive frames, and  $ndt$  is the time interval over which displacement is averaged (Saxton and Jacobson, 1997; Triller and Choquet, 2008). The diffusion coefficient  $D$  was calculated by fitting the first two to five points of the MSD plot versus time with the equation  $MSD(t) = 4D_{2-5t} + 4\sigma_x^2$ , with  $\sigma_x$  is the spot localization accuracy in one direction. Explored area represents the distribution of MSD values at a given interval of time. The explored area of individual trajectories was calculated as the area covered by trajectory in  $\mu\text{m}^2$  during a time-interval of 600 ms to 900 ms. Analysis of the explored area reveals the heterogeneity of the diffusion in the population of trajectories and allows applying statistical tests on MSD data.

#### *Super-resolution STORM imaging and analysis*

Stochastic Optical Reconstruction Microscopy (STORM) imaging, buffer composition and analysis was recently described (Specht et al, 2013; Shrivastava et al, 2013b). STORM was performed following immunolabeling of  $\alpha$ 3-NKA (Mouse- $\alpha$ 3-NKA, 1:3000, 1 hr). Alexa Fluor 647-conjugated (Invitrogen) secondary antibodies were used. Imaging (Alexa647 alone or Alexa647/Dendra) was performed under reducing condition with buffer composed of PBS (pH 7.4), glucose (10%),  $\beta$ -mercaptoethylamine (50 mM), glucose oxidase (0.5 mg/ml), and catalase (40 mg/ml), and degassed with N<sub>2</sub> (Specht et al, 2013). For 2-color STORM involving ATTO488 dye, 10 mM  $\beta$ -mercaptoethylamine was used (Dempsey et al, 2011). STORM imaging was carried out on an inverted Nikon Eclipse Ti microscope equipped with a 100X oil-immersion objective (N.A. 1.49 with a microscope-inbuilt 1.5X lens) using an Andor iXon EMCCD camera (image pixel size, 107 nm). Alexa fluor 647 was imaged using laser 639 nm (1 kW, used at 500 mW) for a 50 ms exposure time. A low-wavelength laser (532 nm (0.5 kW), used at 25-75 mW) was used to convert Alexa fluor 647 from off to on state. TMD-Dendra was imaged using laser 561 nm (0.5kW, used at 300mW) while activating with 405 nm laser (100 mW power, used at 1-10 mW). ATTO488 was imaged with 488 nm laser (0.5kW, used at 75-100 mW) and activated using 405 nm laser. Single molecules detection and rendering was recently described (Shrivastava et al, 2013b). For  $\alpha$ 3-NKA-Alexa647 quantification, individual detections were rendered using a pixel size of 5 nm and Gaussian of 10 nm to visualize clusters

and separate closely spaced clusters. This intensity-based render images were then thresholded using ImageJ to isolate clusters of  $\alpha 3$ -NKA. The threshold-images were then masked on top on individual detections to compute number of detections per cluster. Distance between clusters measures the separation between the centroid of two nanoclusters of  $\alpha 3$ -NKA. This was measured within a maximum radius of 300 nm from the centroid of a given nanocluster. For  $\alpha$ -syn-Alexa647, TMD-Dendra and  $\alpha 3$ -NKA visualization, rendering was done with a pixel size of 20 nm and Gaussian radius of 10 nm.

An implementation of the DBSCAN (Density-Based Spatial Clustering of Applications with Noise) algorithm (Ester et al, 1996) was used for the density based clustering of  $\alpha 3$ -NKA detections. This approach can identify clusters in large spatial data sets by looking at the local density of points. A lowest ‘density threshold’ of minimum 5 detections within a radial distance of 500 nm was used. Higher thresholds used decreasing radial distances. Detections below local ‘density threshold’ or threshold distance were considered non-clustered.

Tetraspeck<sup>TM</sup> microsphere multicolor beads (0.1 $\mu$ m, Invitrogen, T7279) were used for all STORM imaging experiments to correct for stage drift and 2-color-alignment (for 2-color STORM). Beads were diluted to 1:200 (in 1X PBS) and applied for 2 min before imaging. Unbound beads were washed extensively (~10-12 washed). Stage drift (x/y) was corrected over sliding window of 1000 frames (Specht et al, 2013; Shrivastava et al, 2013b). For 2-color STORM images, positions of at least 2-3 beads were simultaneously aligned using ImageJ to ensure correct alignment of two channels.

#### *Sodium Dye Loading, Imaging and Analysis*

Recordings were performed on primary striatal cultures on day *in vitro* 16–21. Cells exposed or not to  $\alpha$ -syn assemblies were loaded with the acetoxymethyl ester derivative forms of the Na<sup>+</sup> sensitive cytosolic ANG2 (Asante NaTRIUM Green 2; 37°C, 5% CO<sub>2</sub>) at 5  $\mu$ M for 30 min in the cell culture medium (Neurobasal, 2% B27, 0.25% L-Glutamine). After washing, the coverslips were placed on a hot plate maintained at 37°C for 20 min in “recording solution” (110 mM NaCl, 4 mM KCl, 1.5 mM CaCl<sub>2</sub>, 1.2 mM MgSO<sub>4</sub>, 25 mM NaHCO<sub>3</sub>, 1 mM NaH<sub>2</sub>PO<sub>4</sub>, 20 mM HEPES, 10 mM glucose, pH 7.4). For imaging, coverslips were mounted on a heated chamber attached with perfusion system for rapid exchange of solutions. ANG2 fluorescence was excited at 490 nm and collected above 500 nm, using a Zeiss Axioscope Observer D1 equipped with a 40X, 1.3NA oil objective and an Andor Ixon camera. The K<sup>+</sup> free recording solution (~25 ml, 0 mM K<sup>+</sup>) had the same composition, except that the NaCl and KCl concentrations were 114 mM and 0 mM, respectively. The 0 mM K<sup>+</sup> recording solution was replaced with normal recording solution and recovery to basal level was monitored until a plateau was reached. At the end of each experiment, neurons were super-fused with Na<sup>+</sup> calibration solutions containing stepwise increasing concentrations of Na<sup>+</sup> in the presence of 3  $\mu$ M gramicidin, 10  $\mu$ M monensin, and 1 mM ouabain until a plateau was reached (**Appendix Figure S6**). Na<sup>+</sup>

calibration solutions contained  $[\text{Na}^+ + \text{K}^+] = 165 \text{ mM}$ ,  $136 \text{ mM}$  gluconate,  $1.2 \text{ mM}$   $\text{MgSO}_4$ ,  $0.78 \text{ mM}$   $\text{KH}_2\text{PO}_4$ ,  $20 \text{ mM}$  HEPES,  $1.3 \text{ mM}$   $\text{CaCl}_2$ , pH adjusted to 7.2 with KOH.

In each experiment, 8-10 regions of interest (ROI) were selected around primary or secondary dendrites from 3-5 cells (using ImageJ). The fluorescence levels for each ROI were measured against time. The  $\text{Na}^+$  data were then analyzed using custom-written code in MATLAB (MathWorks). The fluorescence (F) was corrected for bleaching, smoothed using a 7-point moving average, and normalized to the fluorescence levels of the calibration solutions containing  $10\text{mM}$   $\text{Na}^+$  ( $F_{10\text{mM}}$ ). The increase in peak was defined as  $F/F_{10\text{mM}}(\text{peak}) - F/F_{10\text{mM}}(\text{baseline})$ . The recovery to basal was defined as  $[F/F_{10\text{mM}}(\text{peak}) - F/F_{10\text{mM}}(\text{plateau after the peak})] / [F/F_{10\text{mM}}(\text{peak}) - F/F_{10\text{mM}}(\text{baseline})] \times 100$  (See pictorial representation in **Appendix Figure S6**). The  $\text{Na}^+$  extrusion rate was quantified by fitting the recovery slope to a bi-exponential equation. The apparent maximum initial pumping rate was taken as the absolute value of the maximum derivative of the fitted function.

### *Calcium Imaging and Analysis*

$\text{Ca}^{2+}$  imaging was performed following Fluo-4 ( $1 \mu\text{M}$ ) labeling of neurons for 5 min at  $37^\circ\text{C}$  in MEM recording medium as previously (Renner et al, 2010). After final wash, cells were allowed to recover for 5-10 min before imaging. Images were acquired on an inverted spinning disk microscope (Nikon Eclipse Ti with Yokogawa spinning disk) at 10X magnification using a  $491 \text{ nm}$  wavelength laser ( $100 \text{ mW}$ , Cobolt Calypso). Imaging was performed in a controlled environment at  $37^\circ\text{C}$  and  $5\% \text{ CO}_2$ . Time-lapse images were acquired at  $0.2 \text{ Hz}$  at  $50\%$  laser power and  $50 \text{ ms}$  exposure time to minimize photo-toxicity. Glutamate ( $100 \mu\text{M}$  final concentration) was manually applied using a pipette. For quantification, regions of interest were selected on cell body and total-fluorescence intensity was determined on background-subtracted images (ImageJ). For statistical analysis, ratio of change in fluorescence following glutamate application was calculated. The ratio represents the average intensity of 5 images recorded after glutamate addition divided by the average of 5-images obtained before glutamate application.

### *Software and Statistics*

All analysis of immunocytochemistry, immunohistochemistry, SPT,  $\text{Na}^+$  imaging and STORM were processed and analyzed on MATLAB (Mathworks). Microsoft Excel, Adobe Illustrator, ImageJ and Graph Pad Prism were used for the preparation of figures. The statistical test used is mentioned in figure legends (and supplementary tables). For SPT, Kolmogorov-Smirnov test was used to test the differences in distribution. Pooled diffusion coefficient values from multiple experiments were used as in previous studies (Bannai et al, 2009; Renner et al, 2009, Renner et al, 2010; Shrivastava et al, 2013a, b).

## SUPPLEMENTAL REFERENCES

- Bannai H, Lévi S, Schweizer C, Inoue T, Launey T, Racine V, Sibarita JB, Mikoshiba K, Triller A (2009) Activity-dependent tuning of inhibitory neurotransmission based on GABA<sub>A</sub>R diffusion dynamics. *Neuron* 62: 670–682
- Craig R, Beavis RC (2004) TANDEM: matching proteins with tandem mass spectra. *Bioinforma* 20: 1466–1467
- Dempsey GT, Vaughan JC, Chen KH, Bates M, Zhuang X (2011) Evaluation of fluorophores for optimal performance in localization-based super-resolution imaging. *Nat Methods* 8: 1027-1036
- Ghee M, Melki R, Michot N, Mallet J (2005) PA700, the regulatory complex of the 26S proteasome, interferes with alpha-synuclein assembly. *FEBS J* 272: 4023–4033
- Liu H, Sadygov RG, Yates JR 3rd (2004) A model for random sampling and estimation of relative protein abundance in shotgun proteomics. *Anal Chem* 76: 4193–4201
- Perkins DN, Pappin DJ, Creasy DM, Cottrell JS (1999) Probability-based protein identification by searching sequence databases using mass spectrometry data. *Electrophoresis* 20: 3551–3567
- Racine V, Sachse M, Salamero J, Fraisier V, Trubuil A, Sibarita, JB (2007) Visualization and quantification of vesicle trafficking on a three-dimensional cytoskeleton network in living cells. *J Microsc* 225: 214-228
- Shrivastava AN, Kowalewski JM, Renner M, Bousset L, Koulakoff A, Melki R, Giaume C, Triller A (2013a)  $\beta$ -amyloid and ATP-induced diffusional trapping of astrocyte and neuronal metabotropic glutamate type-5 receptors. *Glia* 61: 1673–1686
- Shrivastava AN, Rodriguez PC, Triller A, Renner M (2013b) Dynamic micro-organization of P2X7 receptors revealed by PALM based single particle tracking. *Front Cell Neurosci* 7: 232
- Specht CG, Izeddin I, Rodriguez PC, El Beheiry M, Rostaing P, Darzacq X, Dahan M, Triller A (2013) Quantitative Nanoscopy of Inhibitory Synapses: Counting Gephyrin Molecules and Receptor Binding Sites. *Neuron* 79: 308-321.
